1 **Nomograms for Predicting the Risk of Acute**  
2 **Heart Failure in ICU Patients with Atrial**  
3 **Fibrillation: A Retrospective Cohort Study**

4

5 Ziyang Wu<sup>1</sup>, Yong Qiao<sup>1</sup>, Gaoliang Yan<sup>1</sup>, Yuhan Qin<sup>1</sup>, Huihong Tang<sup>1</sup>, Shiqi Liu<sup>1</sup>,

6 Dong Wang<sup>1\*</sup>, Chengchun Tang<sup>1\*</sup>

7

8 1 Department of Cardiology, Zhongda hospital, School of Medicine, Southeast

9 University, Dingjiaqiao 87, Gulou district, Nanjing 210009, PR China

10 Correspondence: 220234282@seu.edu.cn

11 \*Corresponding authors

12

13

14

15

16

17

18

19

20

21

22 **NOTE: This preprint reports new research that has not been certified by peer review and should not be used to guide clinical practice.**

# 1 Abstract

## 2 *Aim*

3 This study developed two nomograms to predict the incidence of acute heart failure (AHF) in  
4 patients of atrial fibrillation (AF) and evaluated the predictive value of the nomograms.

## 5 *Method*

6 18179 patients of AF from the Medical Information Mart for Intensive Care IV (MIMIC-IV)  
7 database were analysed. The patients were randomly divided into two groups in a seven-to-three  
8 ratio to form a training cohort (n = 12725) and a validation cohort (n = 5454). Least absolute  
9 shrinkage and selection operator (LASSO) regression analyses were used to identify associated  
10 risk variables. Two nomograms were established to predict the rate of AHF in patients of AF for  
11 use by patients and clinicians, respectively. The new models were assessed in terms of the  
12 concordance index (C-index), the area under the curve (AUC) of receiver operating characteristic  
13 (ROC) analysis, calibration curve, and decision curve analysis (DCA).

## 1 **Results**

2 Least absolute shrinkage and selection operator (LASSO) regression analysis identified seven  
3 potential predictors of acute heart failure in nomogram 1 and three potential predictors in  
4 nomogram 2. Multivariate logistic regression analysis was used to evaluate the effects of these  
5 predictors and create final models. The concordance index values were 0.768 and 0.696,  
6 respectively. The areas under the curves for the training and validation sets in nomogram 1 were  
7 0.768 and 0.763, respectively. The areas under the curves for the training and validation sets in  
8 nomogram 2 were 0.696 and 0.692, respectively.

## 9 **Conclusion**

10 The age, respiratory rate, fluid management, mean corpuscular hemoglobin concentration  
11 (MCHC), bicarbonate, blood urea nitrogen (BUN) and chloride were identified as predictors of the  
12 development of acute heart failure in patients with atrial fibrillation in nomogram 1. The charlson  
13 score, lods score and sapsII score were identified as predictors of the development of acute heart  
14 failure in nomogram 2. Our nomograms are reliable convenient approaches for predicting acute  
15 heart failure in patients with atrial fibrillation.

16 **Keywords:** nomogram, Medical Information Mart for Intensive Care, acute  
17 heart failure, atrial fibrillation

## 18 **Introduction**

19 Atrial fibrillation (AF) is an atrial ectopic tachyarrhythmia [1]. The loss of conduction and  
20 refractory period synchronisation in various parts of the atrium leads to uncoordinated AF in

1 muscle fibres [2]. Possible mechanisms for AF include ectopic pacing points, circular motion, and  
2 multiple micro re-entrances in the atrium [3, 4]. The Global Burden of Disease study has  
3 estimated that there are 33.5 million patients with AF [5]. AF leads to 2-fold and 1.5-fold  
4 increases in the all-cause mortality rate in women and men, respectively, due to progressive  
5 heart failure, cardiac arrest, and embolism; thus, it is a large burden on society [4, 6, 7].

6 The relationship between heart failure and AF has received increasing attention in recent years  
7 [8]. AF and acute heart failure (AHF) are increasing in prevalence, exacerbate each other, and  
8 share clinical features [9, 10]. Animal and human studies have confirmed the connection  
9 between AHF and AF [10-12]. The mechanisms include activation of the renin angiotensin  
10 aldosterone system (RAAS), mechanical traction on the left atrium, and atrial electrophysiological  
11 remodelling [10, 12, 13-15]. AF also plays a role in the occurrence and progression of AHF [16].  
12 Thus far, research has mainly focused on the incidence of AF in patients with AHF; few studies  
13 have examined the incidence of AHF in patients with AF.

14 In oncology and pharmacy, nomograms are widely used to determine prognosis and evaluate the  
15 incidence of an event [17]. This study used data from the MIMIC-IV database to establish and  
16 validate two nomograms that can predict the incidence of AHF in patients with AF; these  
17 nomograms can be used by patients and clinicians, respectively.

## 18 **Methods**

### 19 ***Aim***

20 This study aimed to determine the incidence of AHF in patients with AF.

## 1 ***Database***

2 MIMIC-IV is a publicly available database containing data from 76,540 intensive care unit (ICU)  
3 stays from 2008 to 2019 in the Beth Israel Deaconess Medical Center [18, 19]. This database  
4 contains all baseline data of patients and most laboratory results that can be used for various  
5 studies [20]. It aims to eliminate obstacles to scientific research [21]. The version we used is v2.2,  
6 and PostgreSQL v16 was used to search and extract data from it (<http://www.postgresql.org/>)  
7 [22].

## 8 ***Study populations***

9 This is a retrospective analysis using data from patients with AF stored in MIMIC-IV database. The  
10 inclusion criteria were as follows:

- 11 1. Patients with previous history or new onset of AF.
- 12 2. Patients aged older than 18 years.
- 13 3. Patients admitted to the ICU for the first time.

## 14 ***Data collection and measurement***

15 The characteristics used for our work included demographic data (e.g., age, gender, race and  
16 marital status), vital signs (e.g., heart rate, blood pressure and fluid management), laboratory  
17 results (e.g., routine blood tests, chemistry and coagulation) and common score systems in the  
18 ICU (e.g., LODS score, CHARLSON score and OASIS score). All data were collected six hours before  
19 admission to the ICU to 24 hours after admission to the hospital. Unmarried, married, divorced  
20 and widowed status was marked as 0, 1, 2 and 3, respectively. White people were marked as 0,

1 and people of other races were marked as 1. Women were marked as 0, and men were marked  
2 as 1.

### 3 ***Statistical analysis***

4 Statistical analysis was achieved by using R software (Version 4.1.3; R Foundation for Statistical  
5 Computing, Vienna, Austria; <https://www.r-project.org>) [23]. The distribution of continuous  
6 variables was assessed using the Shapiro–Wilk test. Mean and standard deviation (SD) are  
7 reported for continuous variables having a normal distribution; median and interquartile range  
8 (IQR), for continuous variables having a skewed distribution; and numbers and percentages, for  
9 categorical variables. The Kruskal–Wallis H test was used to compare continuous data. The  
10 Fisher’s exact test was used to compare categorical variables. Seventy percent of the data were  
11 allocated to the training set for developing the model, and the remaining thirty percent were  
12 allocated to the validation set for validation. Records with missing values were deleted or  
13 replaced by using chained equations as appropriate. The LASSO method, which accounts for  
14 multicollinearity and avoids model overfit, was used to select the best candidate variable for  
15 establishing the nomograms [24]. To avoid making the clinical prediction models too complex, the  
16 lambda value was set to ‘1se’ so that the error was within one standard error of the minimum.  
17 Sensitivity and specificity were used to evaluate the models’ performance. The calibration C index  
18 (bootstrap resampling performed 1000 times), the calibration curve and ROC curve were used to  
19 evaluate the discrimination and calibration of the models [25]. DCA was used to identify the  
20 clinical benefit of the models [26]. The area under the receiver operating characteristic curve  
21 values were drawn to assess the stability of the models [27]. All significance tests were two-sided,

1 and a P value < 0.05 was considered statistically significant.

## 2 Results

### 3 *Clinical characteristics*

4 Figure 1 is a flowchart showing the cohort selection process. This study included 18179 patients.

5 Of these, 70% (12725) were randomly assigned to the training set and the remaining 30% (5454)

6 were assigned to the validation set.

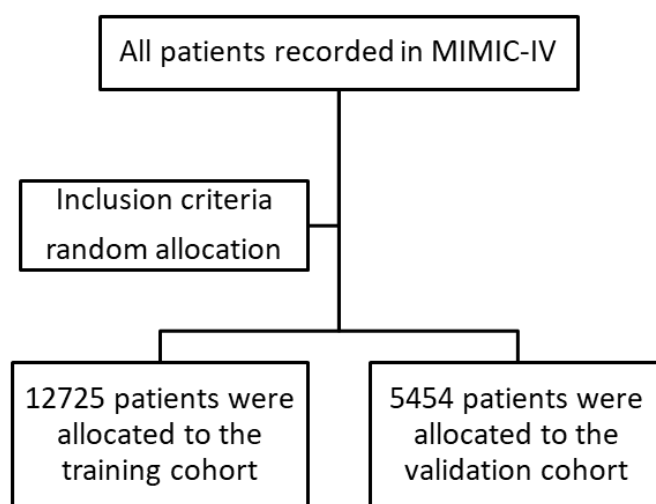

7

8 Figure 1. Flowchart showing the cohort selection process.

9 Table 1 summarizes the data of the enrolled patients. Of the 18179 patients with AF, 4582 were

10 admitted to the ICU for an AHF. The age, weight, body mass index (BMI), heart rate, respiratory

11 rate, fluid management, red blood cells (RBC), white blood cells (WBC), platelet, mean

12 corpuscular volume (MCV), red blood cell distribution width (RDW), anion gap, bicarbonate, BUN,

13 creatinine, Ca, blood glucose, Na, K, international normalized ratio (INR), prothrombin time (PT),

14 partial thromboplastin time (PTT), apsIII score, charlson score, lods score and sapsII score

1 were higher in AHF patients with AF than in AHF patients without AF, the height and gcs score  
2 were the same, while the mean blood pressure, temperature, hemoglobin, hematocrit, mean  
3 corpuscular hemoglobin (MCH), mean corpuscular hemoglobin concentration (MCHC), chloride,  
4 and RDW were lower. Widowed female patients of AF were more likely to develop AHF.  
5 [Table 1 near here.] Table 1. The data on patients enrolled in this study.

## 6 ***Variable selection***

7 Initially, 18189 patients and 46 variables were screened. After removing variables with missing  
8 values exceeding 5% of the total, 39 variables were retained in the study. Variables with missing  
9 values not exceeding 5% were replaced by using chained equations. The values of troponin-T and  
10 N-terminal pro-b-type natriuretic peptide were missing in more than 50% and 70% of patients,  
11 respectively. Although they are significant predictors of cardiac function, once these indicators  
12 are tested, it is possible to determine whether AMI has occurred, so these variables were  
13 excluded. Twentyfold cross-validated LASSO regression and manual screening identified ten  
14 variables: age, respiratory rate, fluid management, MCHC, bicarbonate, BUN and chloride for  
15 nomogram 1, and charlson score, lods score and saps II score for nomogram 2. Figures 2 and 3  
16 illustrate the variable selection process. These ten variables were included in the multivariate  
17 logistic regression model for predicting the occurrence of AHF, and their odd ratios and 95%  
18 confidence intervals (CIs) were 1.32 (1.20–1.46), 1.16 (1.10–1.22), 1.34 (1.25–1.43), 0.72  
19 (0.67-0.79), 1.78 (1.66-1.92), 1.89 (1.77-2.02), 0.69 (0.64-0.74), 2.61 (2.36-2.88), 2.34 (2.07-2.66)  
20 and 0.55 (0.49-0.63) respectively.



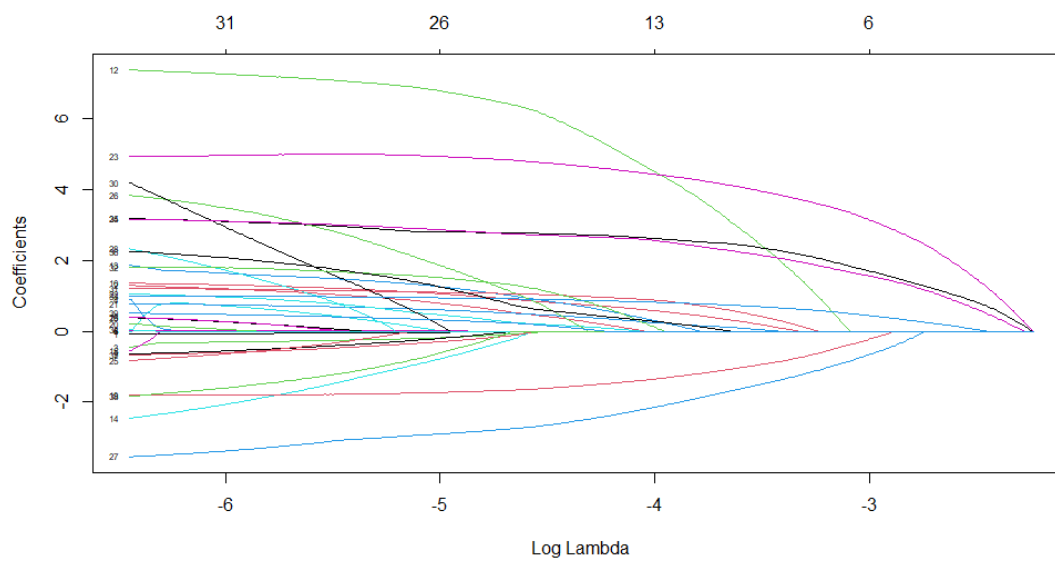

1

2 Figure 2. The variable selection process.

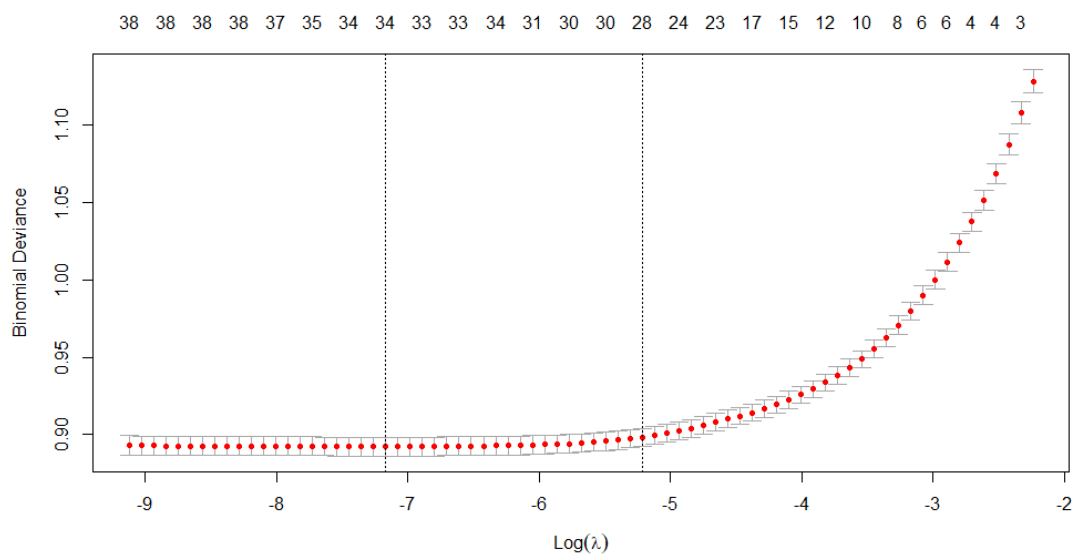

3

4 Figure 3. The variable selection process.

### 5 ***Nomograms construction***

6 A nomogram was established for predicting the occurrence of AHF among AF patients for use  
 7 by patients (Figure 4) and the other nomogram was established for use by clinicians (Figure 5).

8 The ten variables identified above were assigned different initial scores and a total score was  
 9 calculated. The probability of developing AHF increased with the total score.

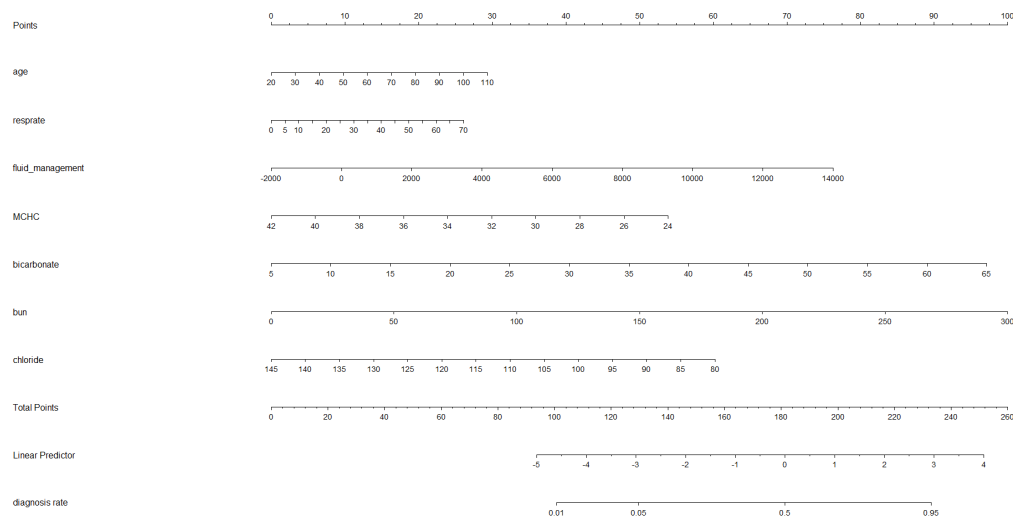

1

2 Figure 4. Nomogram for predicting the occurrence of AHF in AF patients.

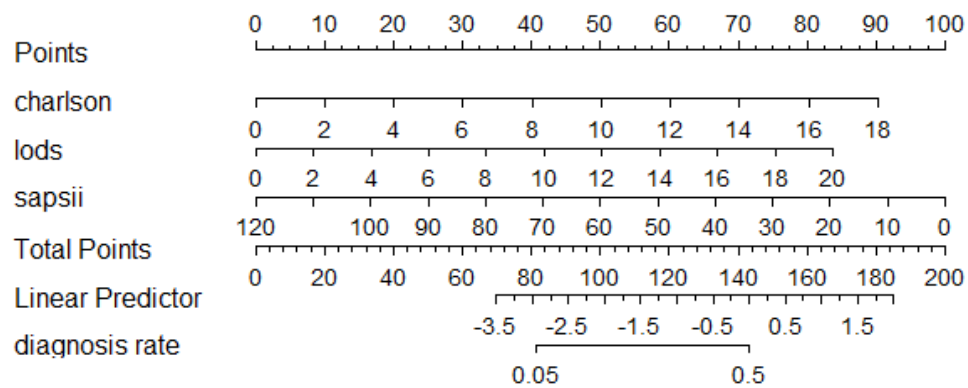

3

4 Figure 5. Nomogram for predicting the occurrence of AHF in AF patients.

## 5 ***Assessment and validation***

6 The calibration curves demonstrated high conformity between the predicted and observed  
 7 probabilities (Figure 6 and 7). ROC curves for the training and test sets were used to evaluate the  
 8 discriminability of the models. The area under the ROC curve was 0.768 in the training set and

- 1 0.763 in the validation set in nomogram 1 (Figures 8 and 9). The area under the ROC curve was
- 2 0.696 in the training set and 0.692 in the validation set in nomogram 2 (Figures 10 and 11). The
- 3 results indicated that our prediction models have good stability and accuracy.

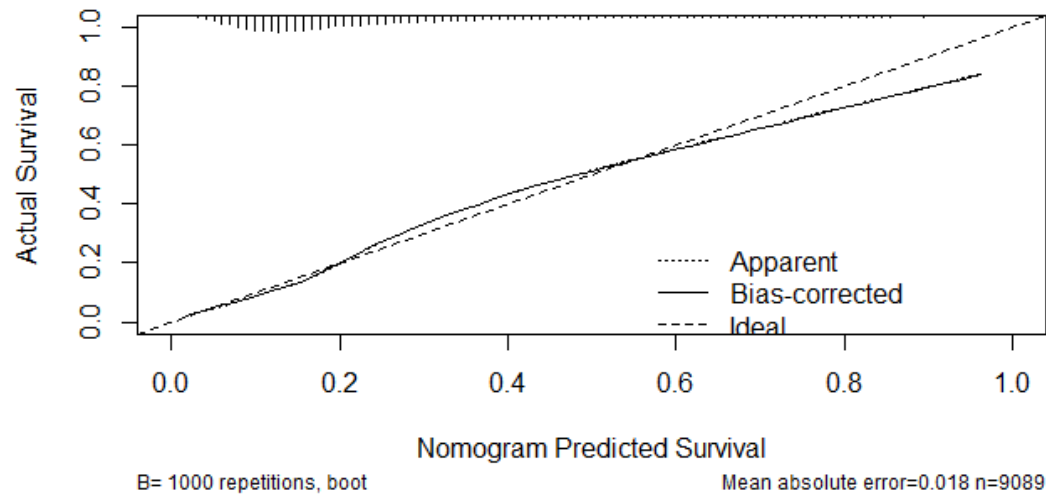

5 Figure 6. The calibration curve of nomogram 1.

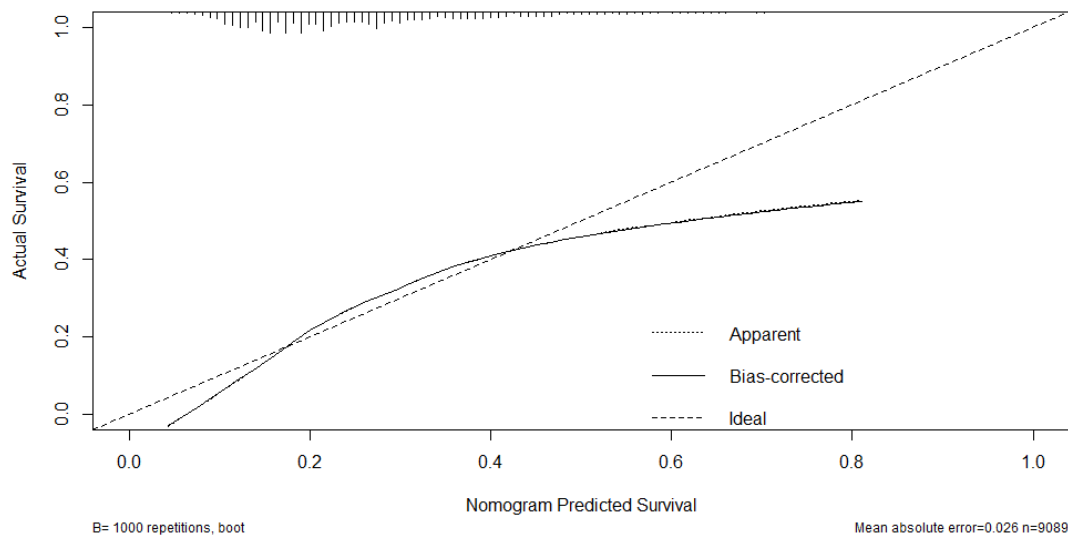

7 Figure 7. The calibration curve of nomogram 2.

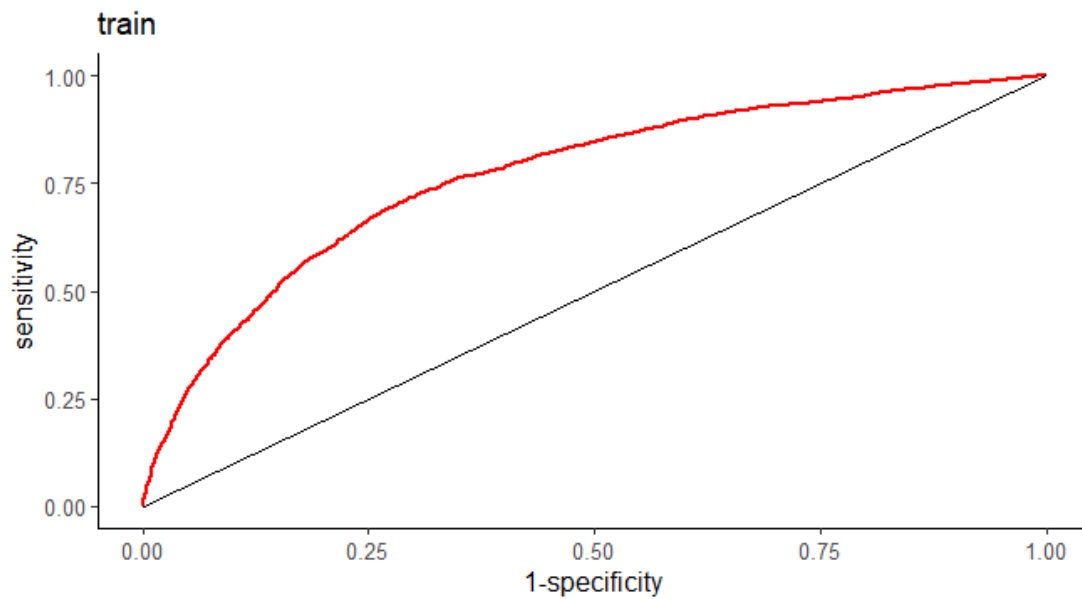

1

2 Figure 8. The ROC curve of the training set in nomogram 1.

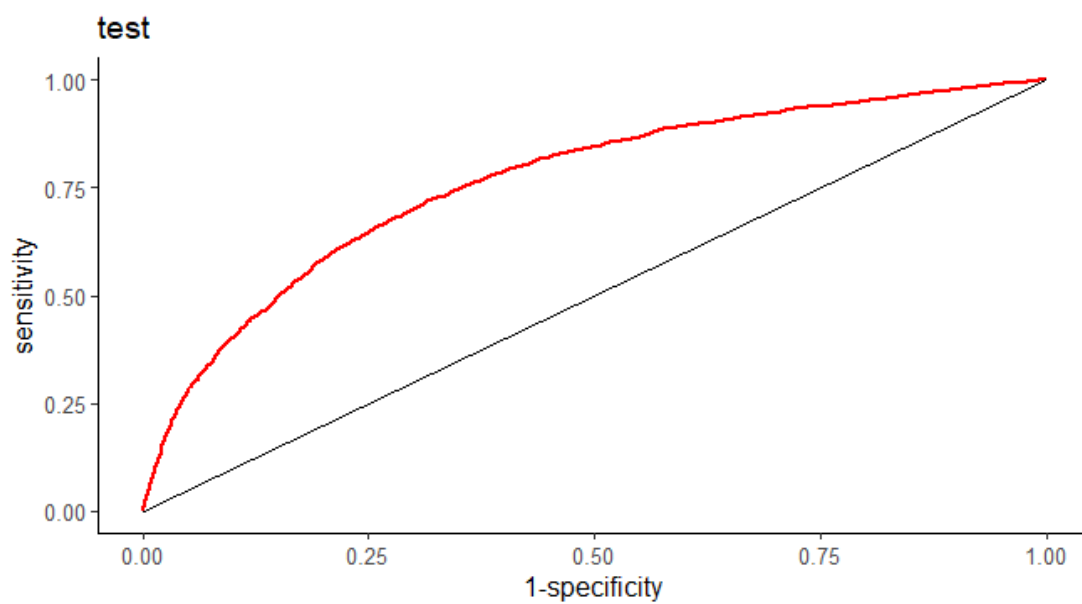

3

4 Figure 9. The ROC curve of the validation set in nomogram 1.

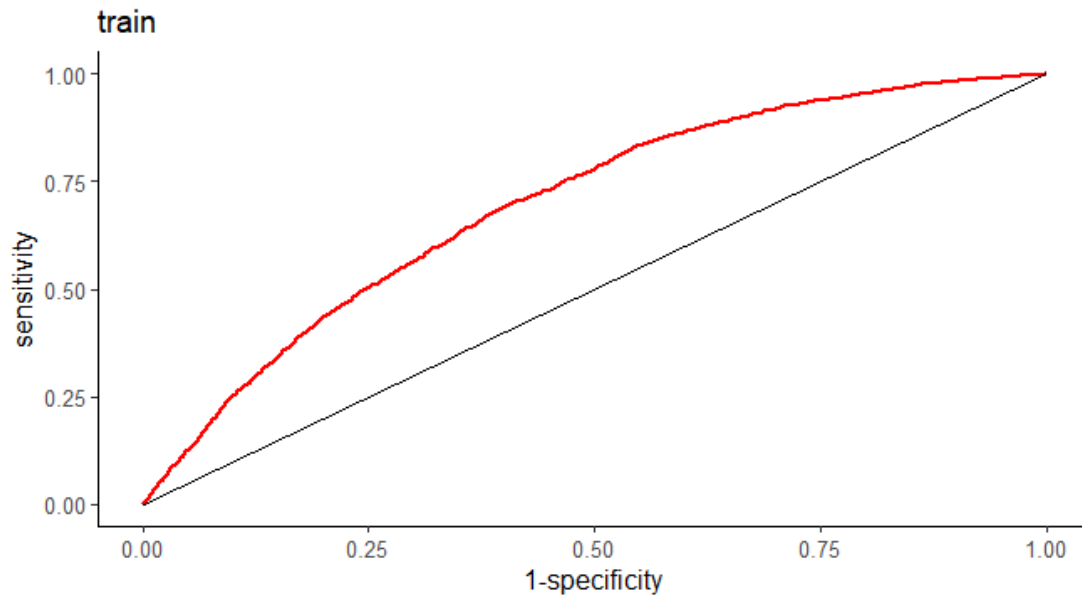

1

2 Figure 10. The ROC curve of the training set in nomogram 2.

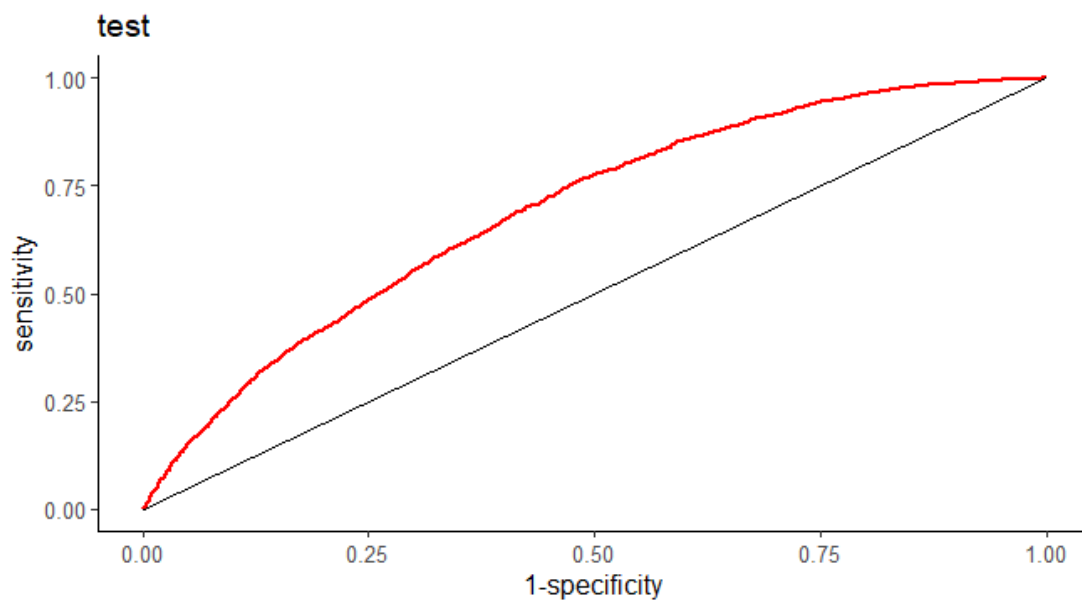

3

4 Figure 11. The ROC curve of the validation set in nomogram 2.

5 Figure 12 and 13 show that the higher the threshold values are, the greater the net benefit of the

6 nomograms decision curves. This indicates the good clinical values of our nomograms.

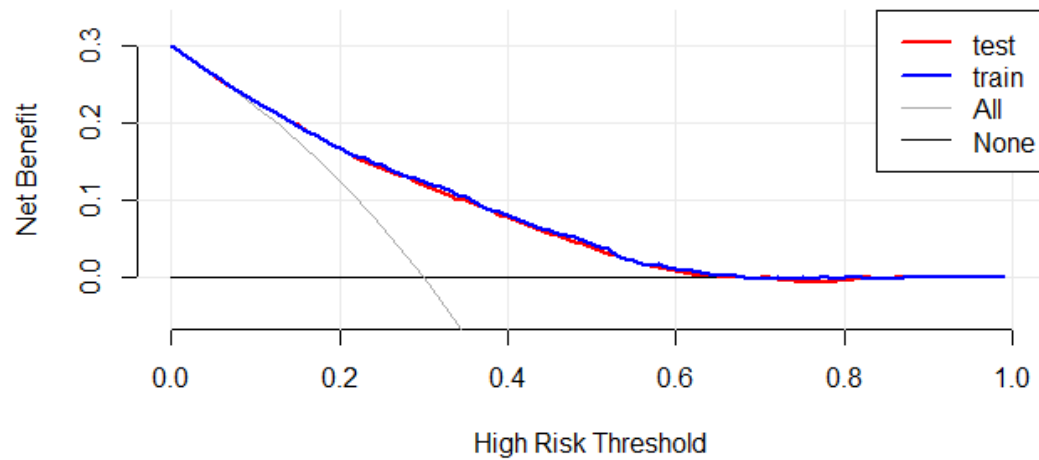

1

2 Figure 12. The decision curve analysis of nomogram 1.

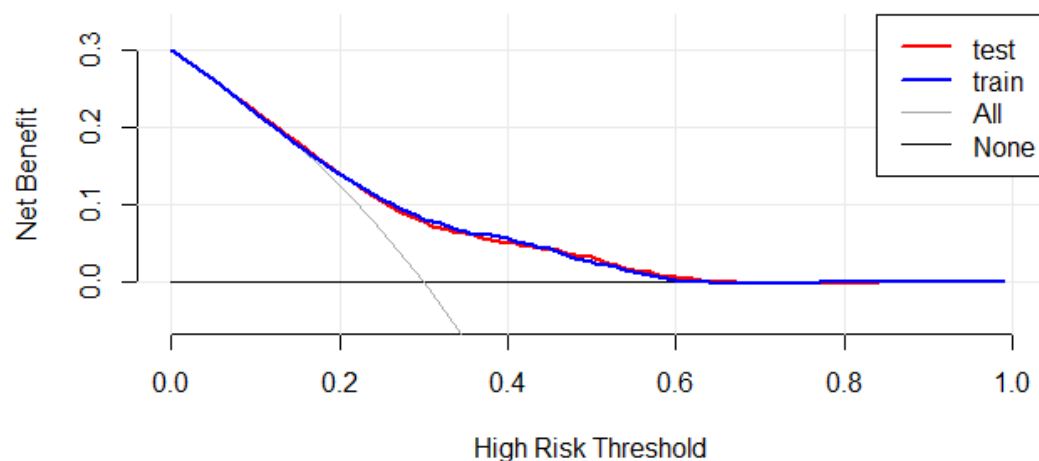

3

4 Figure 13. The decision curve analysis of nomogram 2.

## 5 Discussion

6 This population-based study retrospectively investigated 18,179 ICU patients with AF. Two

7 nomograms were developed and validated to gauge the risk of AHF in those patients. The

8 nomograms contained 10 variables: age; respiratory rate; fluid management; mean corpuscular

1 haemoglobin concentration (MCHC); bicarbonate; blood urea nitrogen (BUN); chloride; and the  
2 Charlson, LODS, and SAPS II scores. Both nomograms had good clinical performance. ROC analysis  
3 of the training and validation cohorts revealed AUCs of 0.768 and 0.763, respectively, for  
4 nomogram 1; these AUCs were 0.696 and 0.692 for nomogram 2. The findings suggest that our  
5 models are sufficiently predictive.

6 The relationship between AF and heart failure remains an area of study [28]. Ischemia, blood  
7 pressure, blood glucose, age, and atherosclerosis are generally regarded as risk factors for both  
8 diseases [29-31, 33]. The incidences of heart failure and AF both gradually increase with age [32,  
9 33], consistent with our findings.

10 When heart failure occurs, the respiratory rate increases. Breathing adjustments affect the  
11 treatment of heart failure [34-36]. This study recognised respiratory rate as a risk factor for AHF  
12 in patients with AF, similar to the results in some previous studies [37]. Input and output volumes  
13 are important for evaluating the degree of heart failure [38, 39]; reductions in output and input  
14 are termed fluid management. Our model 1 showed that greater fluid management increases the  
15 risk of AHF. Relative erythrocyte hypochromia, which manifests as a low MCHC, affects the onset  
16 of AHF [40, 41]; a decrease in the MCHC corresponds to an increase in the risk of AHF. The serum  
17 bicarbonate level also significantly increases in patients with AHF [42], and it can serve as a  
18 predictive indicator. BUN is related to renal function and is not an independent risk factor for AHF,  
19 although it can serve as a warning signal [43]. Chloride is associated with cardiorenal and  
20 neuroendocrine systems [44-46], and many studies regard the chloride level as a prognostic  
21 marker [44]. The present study identified it as a predictive factor, such that a decrease in chlorine

1 was accompanied by an increase in the incidence of AHF. Additionally, the present study utilised  
2 three scoring systems to establish the second nomogram. The use of model 2 requires some  
3 medical expertise; thus, it is designed for clinicians. Although nomogram 2 is less accurate and  
4 predictive compared with nomogram 1, it can provide validation for clinical decision-making.  
5 This study had some limitations. First, all data was obtained from the MIMIC-IV database.  
6 Incomplete records and possible data errors may have reduced model accuracy. Second, this was  
7 a single-centre retrospective study with internal validation alone; external validation is needed to  
8 confirm the reliability of the results. Third, blood lipids were not included in the study due to the  
9 lack of corresponding records in the MIMIC-IV database. Blood lipids are important risk factors  
10 for cardiovascular diseases [47], and further research is needed concerning their implications.  
11 Fourth, the types and severity of AF were not considered; thus, we did not determine the risk of  
12 AHF at each AF severity level. Additionally, all types of AHF were pooled in our analyses. Finally,  
13 our nomograms may predict the possibility of AHF in patients with AF, but they cannot determine  
14 whether interventions should be promptly applied.

## 15 Conclusion

16 Two nomograms to predict the risk of AHF in AF patients were developed using data from the  
17 MIMIC-IV database. The models had good predictive ability. The nomograms can help to screen  
18 AF patients for the risk of AHF and could facilitate good clinical decisions.

## 19 List of abbreviations

20 AHF acute heart failure

21 AF atrial fibrillation



|    |         |                                                 |
|----|---------|-------------------------------------------------|
| 1  | MIMIC   | Medical Information Mart for Intensive Care     |
| 2  | LASSO   | least absolute shrinkage and selection operator |
| 3  | AUC     | area under the curve                            |
| 4  | ROC     | receiver operating characteristic               |
| 5  | DCA     | decision curve analysis                         |
| 6  | C-index | Concordance index                               |
| 7  | SD      | standard deviation                              |
| 8  | IQR     | interquartile range                             |
| 9  | RBC     | red blood cells                                 |
| 10 | WBC     | white blood cells                               |
| 11 | MCV     | mean corpuscular volume                         |
| 12 | RDW     | red blood cell distribution width               |
| 13 | BUN     | blood urea nitrogen                             |
| 14 | INR     | international normalized ratio                  |
| 15 | PT      | prothrombin time                                |
| 16 | PTT     | partial thromboplastin time                     |
| 17 | RDW     | red blood cell distribution width               |
| 18 | MCH     | mean corpuscular hemoglobin                     |
| 19 | MCHC    | mean corpuscular hemoglobin concentration       |
| 20 | BMI     | body mass index                                 |
| 21 | RAAS    | renin angiotensin aldosterone system            |

## 22 Acknowledgements

1 We would like to thank all MIMIC project team members.

## 2 Declarations

### 3 *Ethics approval and consent to participate*

4 This study is a retrospective analysis of data stored in a public database. All information is  
5 available and free for the public, so the agreement of the medical ethics committee board and  
6 the need for informed consent were not necessary.

### 7 *Consent for publication*

8 Not applicable.

### 9 *Supplementary materials*

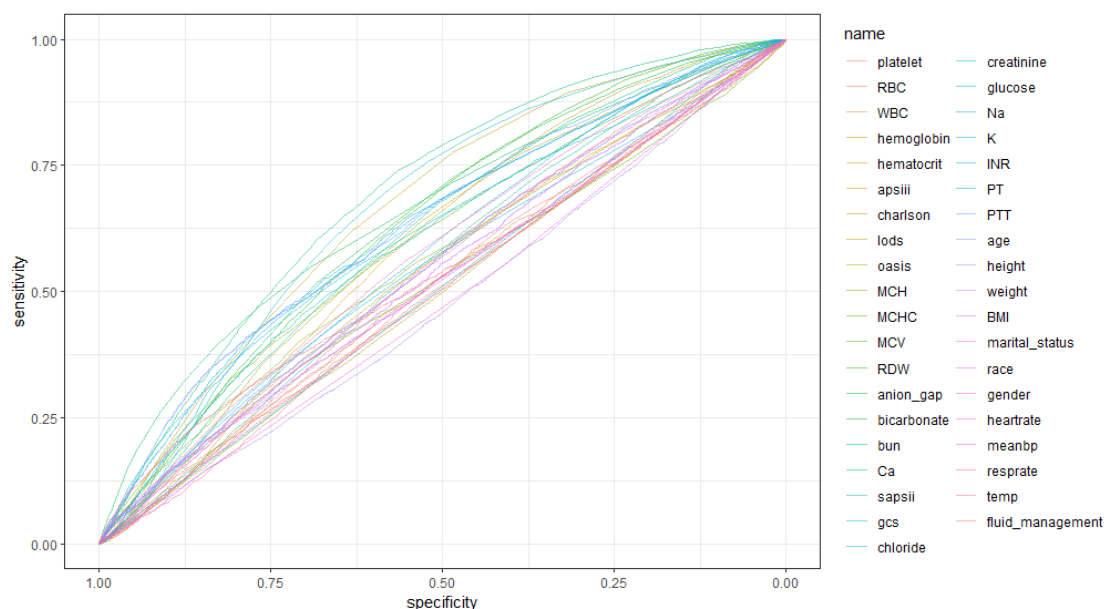

10

11 Figure 14. ROC curves of all screened variables.

12 [Table 2 near here]. Table 2. AUC values of all screened variables.

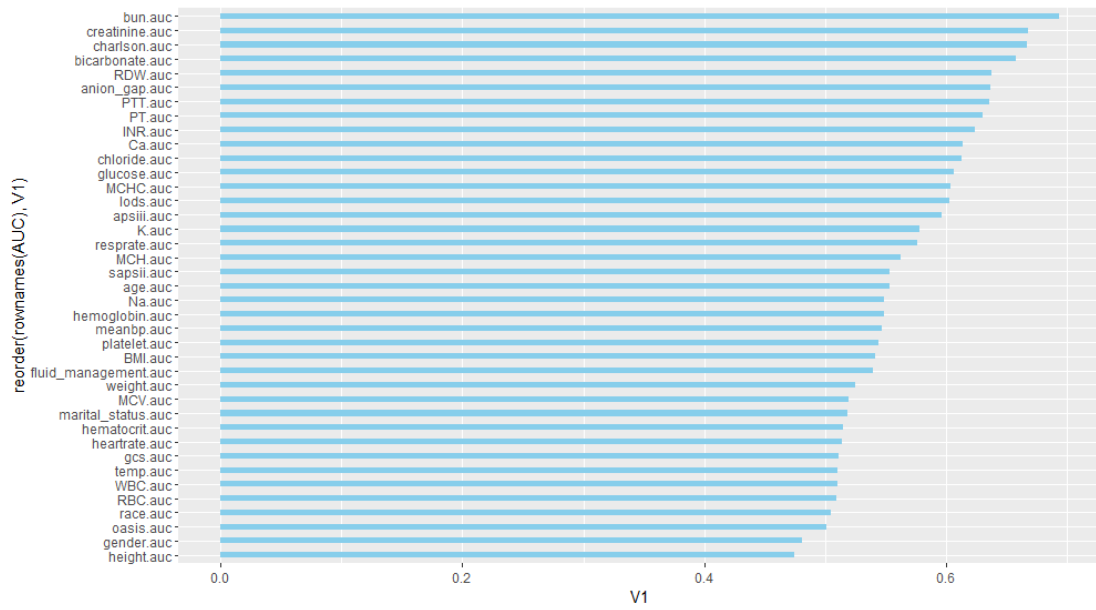

1

2 Figure 15. AUC histogram involving all screened variables.

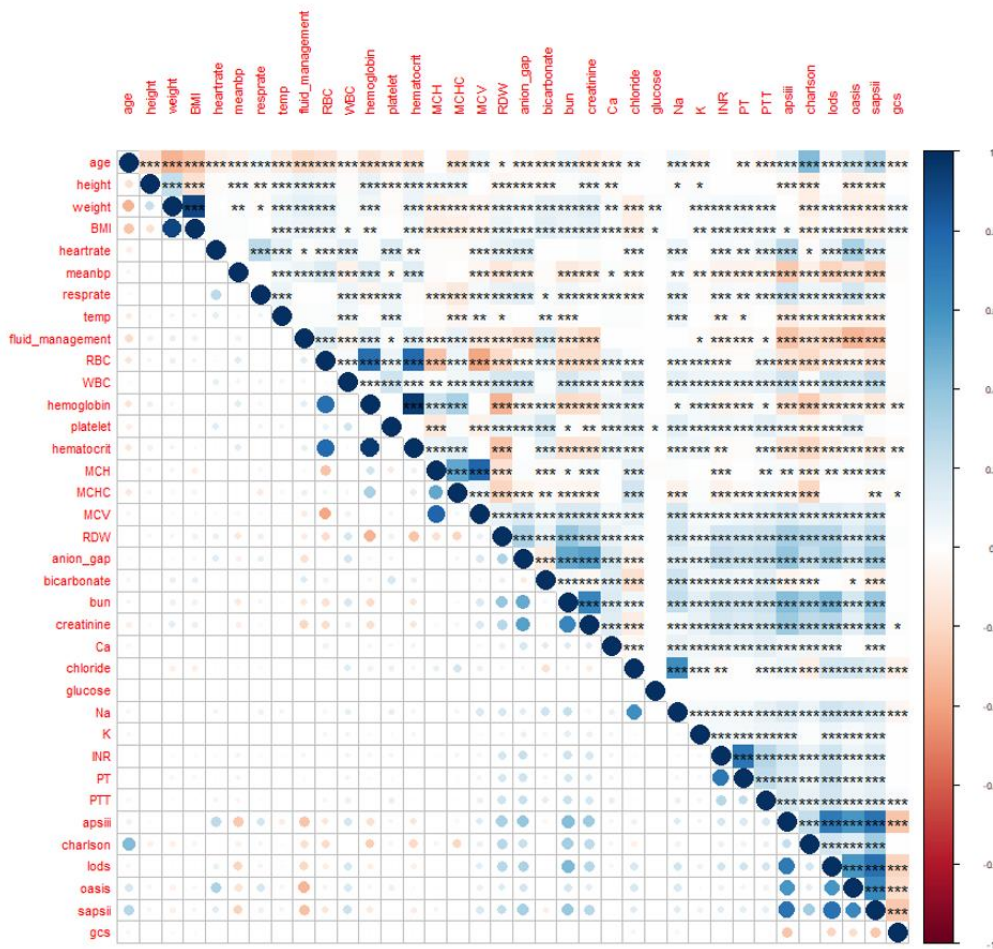

3

4 Figure 16. Heatmap involving all screened variables.

## 1 ***Availability of data and materials***

2 All data generated or analysed during this study are included in this published article and its  
3 supplementary information files.

## 4 ***Competing interests***

5 No competing interests.

## 6 ***Funding***

7 No funding.

## 8 ***Author contributions***

9 Ziyang Wu conceived, designed the study and drafted the manuscript. Yong Qiao, Gaoliang Yan,  
10 Yuhan Qin, Huihong Tang and Shiqi Liu drafted the manuscript. Chengchun Tang and Dong Wang  
11 revised the manuscript and approved the final version to be published. All authors read and  
12 approved the final manuscript.

## 13 **References**

- 14 [1] Baman JR, Passman RS. Atrial Fibrillation. JAMA. 2021 Jun 1;325(21):2218. doi:  
15 10.1001/jama.2020.23700. PMID: 34061143.
- 16 [2] Zimetbaum P. Atrial Fibrillation. Ann Intern Med. 2017 Mar 7;166(5):ITC33-ITC48. doi:  
17 10.7326/AITC201703070. Erratum in: Ann Intern Med. 2017 Jun 20;166(12 ):920. PMID:  
18 28265666.
- 19 [3] Brundel BJM, Ai X, Hills MT, Kuipers MF, Lip GYH, de Groot NMS. Atrial fibrillation. Nat Rev Dis

- 1 Primers. 2022 Apr 7;8(1):21. doi: 10.1038/s41572-022-00347-9. PMID: 35393446.
- 2 [4] Wijesurendra RS, Casadei B. Mechanisms of atrial fibrillation. Heart. 2019
- 3 Dec;105(24):1860-1867. doi: 10.1136/heartjnl-2018-314267. Epub 2019 Aug 23. PMID:
- 4 31444267.
- 5 [5] Saleh K, Haldar S. Atrial fibrillation: a contemporary update. Clin Med (Lond). 2023
- 6 Sep;23(5):437-441. doi: 10.7861/clinmed.2023-23.5.Cardio2. Epub 2023 Sep 29. PMID: 37775166;
- 7 PMCID: PMC10541273.
- 8 [6] Bosch NA, Cimini J, Walkey AJ. Atrial Fibrillation in the ICU. Chest. 2018 Dec;154(6):1424-1434.
- 9 doi: 10.1016/j.chest.2018.03.040. Epub 2018 Apr 6. PMID: 29627355; PMCID: PMC6335260.
- 10 [7] Alonso A, Almuwaqqat Z, Chamberlain A. Mortality in atrial fibrillation. Is it changing? Trends
- 11 Cardiovasc Med. 2021 Nov;31(8):469-473. doi: 10.1016/j.tcm.2020.10.010. Epub 2020 Oct 27.
- 12 PMID: 33127438; PMCID: PMC8076338.
- 13 [8] Carlisle MA, Fudim M, DeVore AD, Piccini JP. Heart Failure and Atrial Fibrillation, Like Fire and
- 14 Fury. JACC Heart Fail. 2019 Jun;7(6):447-456. doi: 10.1016/j.jchf.2019.03.005. PMID: 31146871.
- 15 [9] Kotecha D, Lam CS, Van Veldhuisen DJ, Van Gelder IC, Voors AA, Rienstra M. Heart Failure
- 16 With Preserved Ejection Fraction and Atrial Fibrillation: Vicious Twins. J Am Coll Cardiol. 2016 Nov
- 17 15;68(20):2217-2228. doi: 10.1016/j.jacc.2016.08.048. PMID: 27855811.
- 18 [10] Park JJ, Lee HY, Kim KH, Yoo BS, Kang SM, Baek SH, Jeon ES, Kim JJ, Cho MC, Chae SC, Oh BH,
- 19 Choi DJ. Heart failure and atrial fibrillation: tachycardia-mediated acute decompensation. ESC
- 20 Heart Fail. 2021 Aug;8(4):2816-2825. doi: 10.1002/ehf2.13354. Epub 2021 May 6. PMID:
- 21 33960144; PMCID: PMC8318460.
- 22 [11] Gorenek B, Halvorsen S, Kudaiberdieva G, Bueno H, Van Gelder IC, Lettino M, Marin F, Masip

- 1 J, Mueller C, Okutucu S, Poess J, Potpara TS, Price S, Lip GYH. Atrial fibrillation in acute heart  
2 failure: A position statement from the Acute Cardiovascular Care Association and European Heart  
3 Rhythm Association of the European Society of Cardiology. *Eur Heart J Acute Cardiovasc Care*.  
4 2020 Jun;9(4):348-357. doi: 10.1177/2048872619894255. Epub 2020 Jan 24. PMID: 31976747.
- 5 [12] Okutucu S, Görenek B. Perspectives by a position statement on atrial fibrillation in acute  
6 heart failure a: Mechanisms and therapeutic approaches. *Anatol J Cardiol*. 2020  
7 Jun;23(6):308-311. doi: 10.14744/AnatolJCardiol.2020.17064. PMID: 32478687; PMCID:  
8 PMC7414243.
- 9 [13] DiMarco JP. Atrial fibrillation and acute decompensated heart failure. *Circ Heart Fail*. 2009  
10 Jan;2(1):72-3. doi: 10.1161/CIRCHEARTFAILURE.108.830349. PMID: 19808318.
- 11 [14] Arora S, Brown ZD, Sivaraj K, Hendrickson MJ, Mazzella AJ, Chang PP, Vaduganathan M,  
12 Qamar A, Gehi AK, Pandey A, Vavalle JP. The Relationship Between Atrial Fibrillation, Mitral  
13 Regurgitation, and Heart Failure Subtype: The ARIC Study. *J Card Fail*. 2022 Jun;28(6):883-892. doi:  
14 10.1016/j.cardfail.2021.10.015. Epub 2021 Dec 23. PMID: 34955335.
- 15 [15] Rahbar Kouibaran F, Sabatino M, Barozzi C, Diemberger I. Atrial Natriuretic Peptides as a  
16 Bridge between Atrial Fibrillation, Heart Failure, and Amyloidosis of the Atria. *Int J Mol Sci*. 2023  
17 Mar 30;24(7):6470. doi: 10.3390/ijms24076470. PMID: 37047444; PMCID: PMC10095038.
- 18 [16] Diaz J, Martinez F, Calderon JM, Fernandez A, Sauri I, Uso R, Trillo JL, Redon J, Forner MJ.  
19 Incidence and impact of atrial fibrillation in heart failure patients: real-world data in a large  
20 community. *ESC Heart Fail*. 2022 Dec;9(6):4230-4239. doi: 10.1002/ehf2.14124. Epub 2022 Sep  
21 16. PMID: 36111519; PMCID: PMC9773729.
- 22 [17] Zhang L, Tang L, Chen S, Chen C, Peng B. A nomogram for predicting the 4-year risk of chronic

- 1 kidney disease among Chinese elderly adults. *Int Urol Nephrol*. 2023 Jun;55(6):1609-1617. doi:  
2 10.1007/s11255-023-03470-y. Epub 2023 Jan 31. PMID: 36720744.
- 3 [18] Johnson AEW, Bulgarelli L, Shen L, Gayles A, Shammout A, Horng S, Pollard TJ, Hao S, Moody  
4 B, Gow B, Lehman LH, Celi LA, Mark RG. MIMIC-IV, a freely accessible electronic health record  
5 dataset. *Sci Data*. 2023 Jan 3;10(1):1. doi: 10.1038/s41597-022-01899-x. Erratum in: *Sci Data*.  
6 2023 Jan 16;10(1):31. Erratum in: *Sci Data*. 2023 Apr 18;10(1):219. PMID: 36596836; PMCID:  
7 PMC9810617.
- 8 [19] Li Y, Cai Z, She Y, Shen W, Wang T, Luo L. Development and validation of a nomogram for  
9 predicting atrial fibrillation in patients with acute heart failure admitted to the ICU: a  
10 retrospective cohort study. *BMC Cardiovasc Disord*. 2022 Dec 6;22(1):528. doi:  
11 10.1186/s12872-022-02973-3. PMID: 36474152; PMCID: PMC9724334.
- 12 [20] Liu T, Zhao Q, Du B. Effects of high-flow oxygen therapy on patients with hypoxemia after  
13 extubation and predictors of reintubation: a retrospective study based on the MIMIC-IV database.  
14 *BMC Pulm Med*. 2021 May 13;21(1):160. doi: 10.1186/s12890-021-01526-2. Erratum in: *BMC*  
15 *Pulm Med*. 2021 Jun 9;21(1):194. PMID: 33985472; PMCID: PMC8118109.
- 16 [21] Wu WT, Li YJ, Feng AZ, Li L, Huang T, Xu AD, Lyu J. Data mining in clinical big data: the  
17 frequently used databases, steps, and methodological models. *Mil Med Res*. 2021 Aug 11;8(1):44.  
18 doi: 10.1186/s40779-021-00338-z. PMID: 34380547; PMCID: PMC8356424.
- 19 [22] Stothers JAM, Nguyen A. Can Neo4j Replace PostgreSQL in Healthcare? *AMIA Jt Summits*  
20 *Transl Sci Proc*. 2020 May 30;2020:646-653. PMID: 32477687; PMCID: PMC7233060.
- 21 [23] Chan BKC. *Data Analysis Using R Programming*. *Adv Exp Med Biol*. 2018;1082:47-122. doi:  
22 10.1007/978-3-319-93791-5\_2. PMID: 30357717.

- 1 [24] Robert Tibshirani, Regression Shrinkage and Selection Via the Lasso, Journal of the Royal  
2 Statistical Society: Series B (Methodological), Volume 58, Issue 1, January 1996, Pages 267–288,  
3 <https://doi.org/10.1111/j.2517-6161.1996.tb02080.x>
- 4 [25] Mandrekar JN. Receiver operating characteristic curve in diagnostic test assessment. J Thorac  
5 Oncol. 2010 Sep;5(9):1315-6. doi: 10.1097/JTO.0b013e3181ec173d. PMID: 20736804.
- 6 [26] Van Calster B, Wynants L, Verbeek JFM, Verbakel JY, Christodoulou E, Vickers AJ, Roobol MJ,  
7 Steyerberg EW. Reporting and Interpreting Decision Curve Analysis: A Guide for Investigators. Eur  
8 Urol. 2018 Dec;74(6):796-804. doi: 10.1016/j.eururo.2018.08.038. Epub 2018 Sep 19. PMID:  
9 30241973; PMCID: PMC6261531.
- 10 [27] Janssens ACJW, Martens FK. Reflection on modern methods: Revisiting the area under the  
11 ROC Curve. Int J Epidemiol. 2020 Aug 1;49(4):1397-1403. doi: 10.1093/ije/dyz274. PMID:  
12 31967640.
- 13 [28] Hu CY, Wang CY, Li JY, Ma J, Li ZQ. Relationship between atrial fibrillation and heart failure.  
14 Eur Rev Med Pharmacol Sci. 2016 Nov;20(21):4593-4600. PMID: 27874936.
- 15 [29] Hohendanner F, Heinzl FR, Blaschke F, Pieske BM, Haverkamp W, Boldt HL, Parwani AS.  
16 Pathophysiological and therapeutic implications in patients with atrial fibrillation and heart  
17 failure. Heart Fail Rev. 2018 Jan;23(1):27-36. doi: 10.1007/s10741-017-9657-9. PMID: 29038991.
- 18 [30] Mehra MR, Butler J. Atrial fibrillation and heart failure: it takes two to tango. Foreword.  
19 Heart Fail Clin. 2013 Oct;9(4):xiii-xiv. doi: 10.1016/j.hfc.2013.08.001. Epub 2013 Aug 19. PMID:  
20 24054485.
- 21 [31] Rosano G, Savarese G. Inter-twinning relationship between heart failure and atrial fibrillation.  
22 Heart. 2020 Aug;106(15):1125-1126. doi: 10.1136/heartjnl-2020-316886. Epub 2020 Jun 1. PMID:



1 32482671.

2 [32] Emmons-Bell S, Johnson C, Roth G. Prevalence, incidence and survival of heart failure: a  
3 systematic review. *Heart*. 2022 Aug 11;108(17):1351-1360. doi: 10.1136/heartjnl-2021-320131.  
4 PMID: 35042750; PMCID: PMC9380485.

5 [33] Bessissow A, Khan J, Devereaux PJ, Alvarez-Garcia J, Alonso-Coello P. Postoperative atrial  
6 fibrillation in non-cardiac and cardiac surgery: an overview. *J Thromb Haemost*. 2015 Jun;13  
7 Suppl 1:S304-12. doi: 10.1111/jth.12974. Erratum in: *J Thromb Haemost*. 2015 Nov;13(11):2134.  
8 PMID: 26149040.

9 [34] Radaelli A, Mancina G, Balestri G, Bonfanti D, Castiglioni P. Respiratory patterns and baroreflex  
10 function in heart failure. *Sci Rep*. 2023 Feb 8;13(1):2220. doi: 10.1038/s41598-023-29271-y. PMID:  
11 36755066; PMCID: PMC9908869.

12 [35] Masip J, Peacock WF, Price S, Cullen L, Martin-Sanchez FJ, Seferovic P, Maisel AS, Miro O,  
13 Filippatos G, Vrints C, Christ M, Cowie M, Platz E, McMurray J, DiSomma S, Zeymer U, Bueno H,  
14 Gale CP, Lettino M, Tavares M, Ruschitzka F, Mebazaa A, Harjola VP, Mueller C; Acute Heart  
15 Failure Study Group of the Acute Cardiovascular Care Association and the Committee on Acute  
16 Heart Failure of the Heart Failure Association of the European Society of Cardiology. Indications  
17 and practical approach to non-invasive ventilation in acute heart failure. *Eur Heart J*. 2018 Jan  
18 1;39(1):17-25. doi: 10.1093/eurheartj/ehx580. PMID: 29186485; PMCID: PMC6251669.

19 [36] Biegus J, Zymlński R, Sokolski M, Gajewski P, Banasiak W, Ponikowski P. Clinical, respiratory,  
20 haemodynamic, and metabolic determinants of lactate in heart failure. *Kardiol Pol*.  
21 2019;77(1):47-52. doi: 10.5603/KP.a2018.0240. Epub 2018 Dec 19. PMID: 30566223.

22 [37] Siniorakis E, Arvanitakis S, Tsitsimpikou C, Tsarouhas K, Tzevelekos P, Panta S, Aivalioti F,

- 1 Zampelis C, Triposkiadis F, Limberi S. Acute Heart Failure in the Emergency Department:  
2 Respiratory Rate as a Risk Predictor. *In Vivo*. 2018 Jul-Aug;32(4):921-925. doi:  
3 10.21873/invivo.11330. PMID: 29936481; PMCID: PMC6117786.
- 4 [38] La Franca E, Manno G, Ajello L, Di Gesaro G, Minà C, Visconti C, Bellavia D, Falletta C,  
5 Romano G, Dell' Oglia S, Licata P, Caronia A, Gallo M, Clemenza F. Physiopathology and Diagnosis  
6 of Congestive Heart Failure: Consolidated Certainties and New Perspectives. *Curr Probl Cardiol*.  
7 2021 Mar;46(3):100691. doi: 10.1016/j.cpcardiol.2020.100691. Epub 2020 Aug 29. PMID:  
8 33012532.
- 9 [39] Miller WL. Fluid Volume Overload and Congestion in Heart Failure: Time to Reconsider  
10 Pathophysiology and How Volume Is Assessed. *Circ Heart Fail*. 2016 Aug;9(8):e002922. doi:  
11 10.1161/CIRCHEARTFAILURE.115.002922. PMID: 27436837.
- 12 [40] Kleber M, Kozhuharov N, Sabti Z, Glatz B, Isenreich R, Wussler D, Nowak A, Twerenbold R,  
13 Badertscher P, Puelacher C, du Fay de Lavallaz J, Nestelberger T, Boeddinghaus J, Wildi K, Flores D,  
14 Walter J, Rentsch K, von Eckardstein A, Goudev A, Breidthardt T, Mueller C. Relative hypochromia  
15 and mortality in acute heart failure. *Int J Cardiol*. 2019 Jul 1;286:104-110. doi:  
16 10.1016/j.ijcard.2019.02.060. Epub 2019 Feb 27. PMID: 30853296.
- 17 [41] Choy M, Zhen Z, Dong B, Chen C, Dong Y, Liu C, Liang W, Xue R. Mean corpuscular  
18 haemoglobin concentration and outcomes in heart failure with preserved ejection fraction. *ESC*  
19 *Heart Fail*. 2023 Apr;10(2):1214-1221. doi: 10.1002/ehf2.14225. Epub 2023 Jan 25. PMID:  
20 36695165; PMCID: PMC10053270.
- 21 [42] Cooper LB, Mentz RJ, Gallup D, Lala A, DeVore AD, Vader JM, AbouEzzeddine OF, Bart BA,  
22 Anstrom KJ, Hernandez AF, Felker GM. Serum Bicarbonate in Acute Heart Failure: Relationship to

- 1 Treatment Strategies and Clinical Outcomes. J Card Fail. 2016 Sep;22(9):738-42. doi:  
2 10.1016/j.cardfail.2016.01.007. Epub 2016 Jan 14. PMID: 26777758; PMCID: PMC4945480.
- 3 [43] Llauger L, Jacob J, Miró Ò. Renal function and acute heart failure outcome. Med Clin (Barc).  
4 2018 Oct 12;151(7):281-290. English, Spanish. doi: 10.1016/j.medcli.2018.05.010. Epub 2018 Jun  
5 6. PMID: 29884452.
- 6 [44] Zandijk AJL, van Norel MR, Julius FEC, Sepehrvand N, Pannu N, McAlister FA, Voors AA,  
7 Ezekowitz JA. Chloride in Heart Failure: The Neglected Electrolyte. JACC Heart Fail. 2021  
8 Dec;9(12):904-915. doi: 10.1016/j.jchf.2021.07.006. Epub 2021 Oct 6. PMID: 34857174.
- 9 [45] Kazory A. Chloride and Cardiorenal Interactions in Heart Failure. Nephron. 2023;147(1):6-8.  
10 doi: 10.1159/000524987. Epub 2022 May 31. PMID: 35640556.
- 11 [46] Rivera FB, Alfonso P, Golbin JM, Lo K, Lerma E, Volgman AS, Kazory A. The Role of Serum  
12 Chloride in Acute and Chronic Heart Failure: A Narrative Review. Cardiorenal Med.  
13 2021;11(2):87-98. doi: 10.1159/000515604. Epub 2021 Apr 19. PMID: 33873189.
- 14 [47] Siri-Tarino PW, Sun Q, Hu FB, Krauss RM. Saturated fat, carbohydrate, and cardiovascular  
15 disease. Am J Clin Nutr. 2010 Mar;91(3):502-9. doi: 10.3945/ajcn.2008.26285. Epub 2010 Jan 20.  
16 PMID: 20089734; PMCID: PMC2824150.

17

18 The English in this document has been checked by at least two professional editors,  
19 both native speakers of English. For a certificate, please see:

20 <http://www.textcheck.com/certificate/aTgAHx>

21

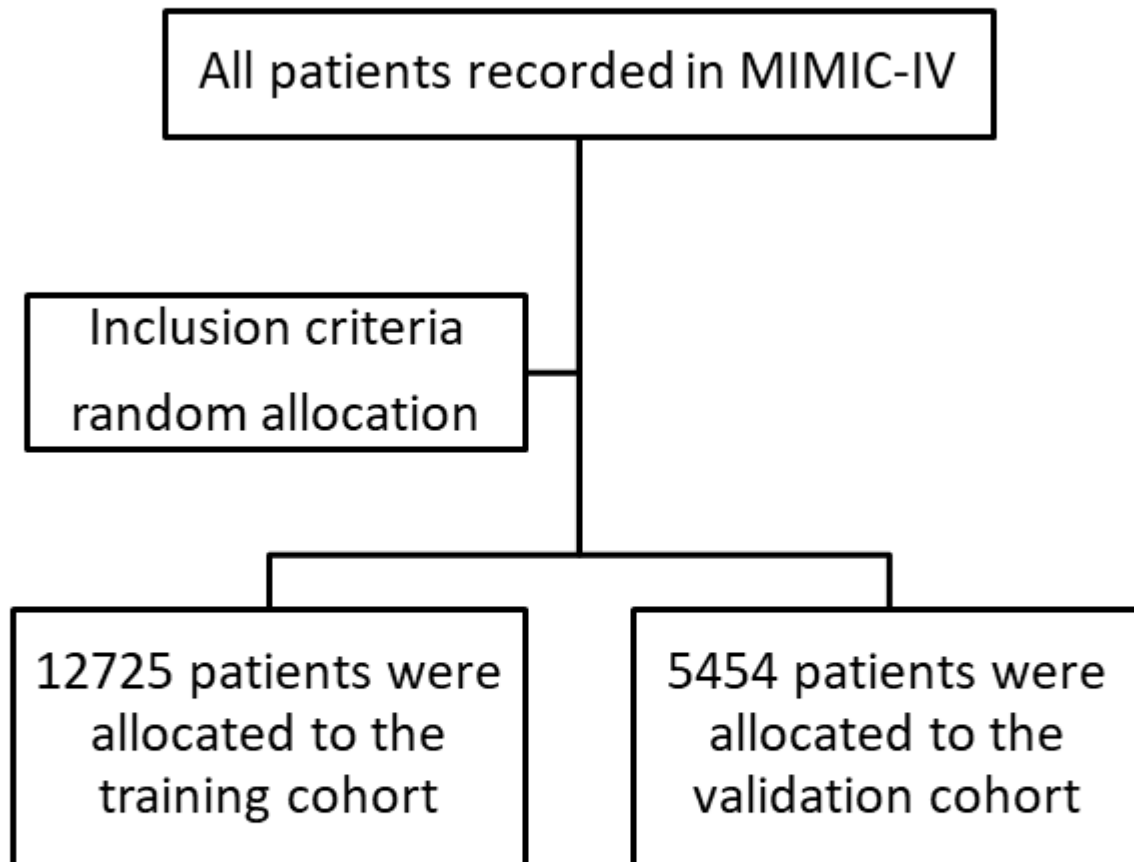

Coefficients

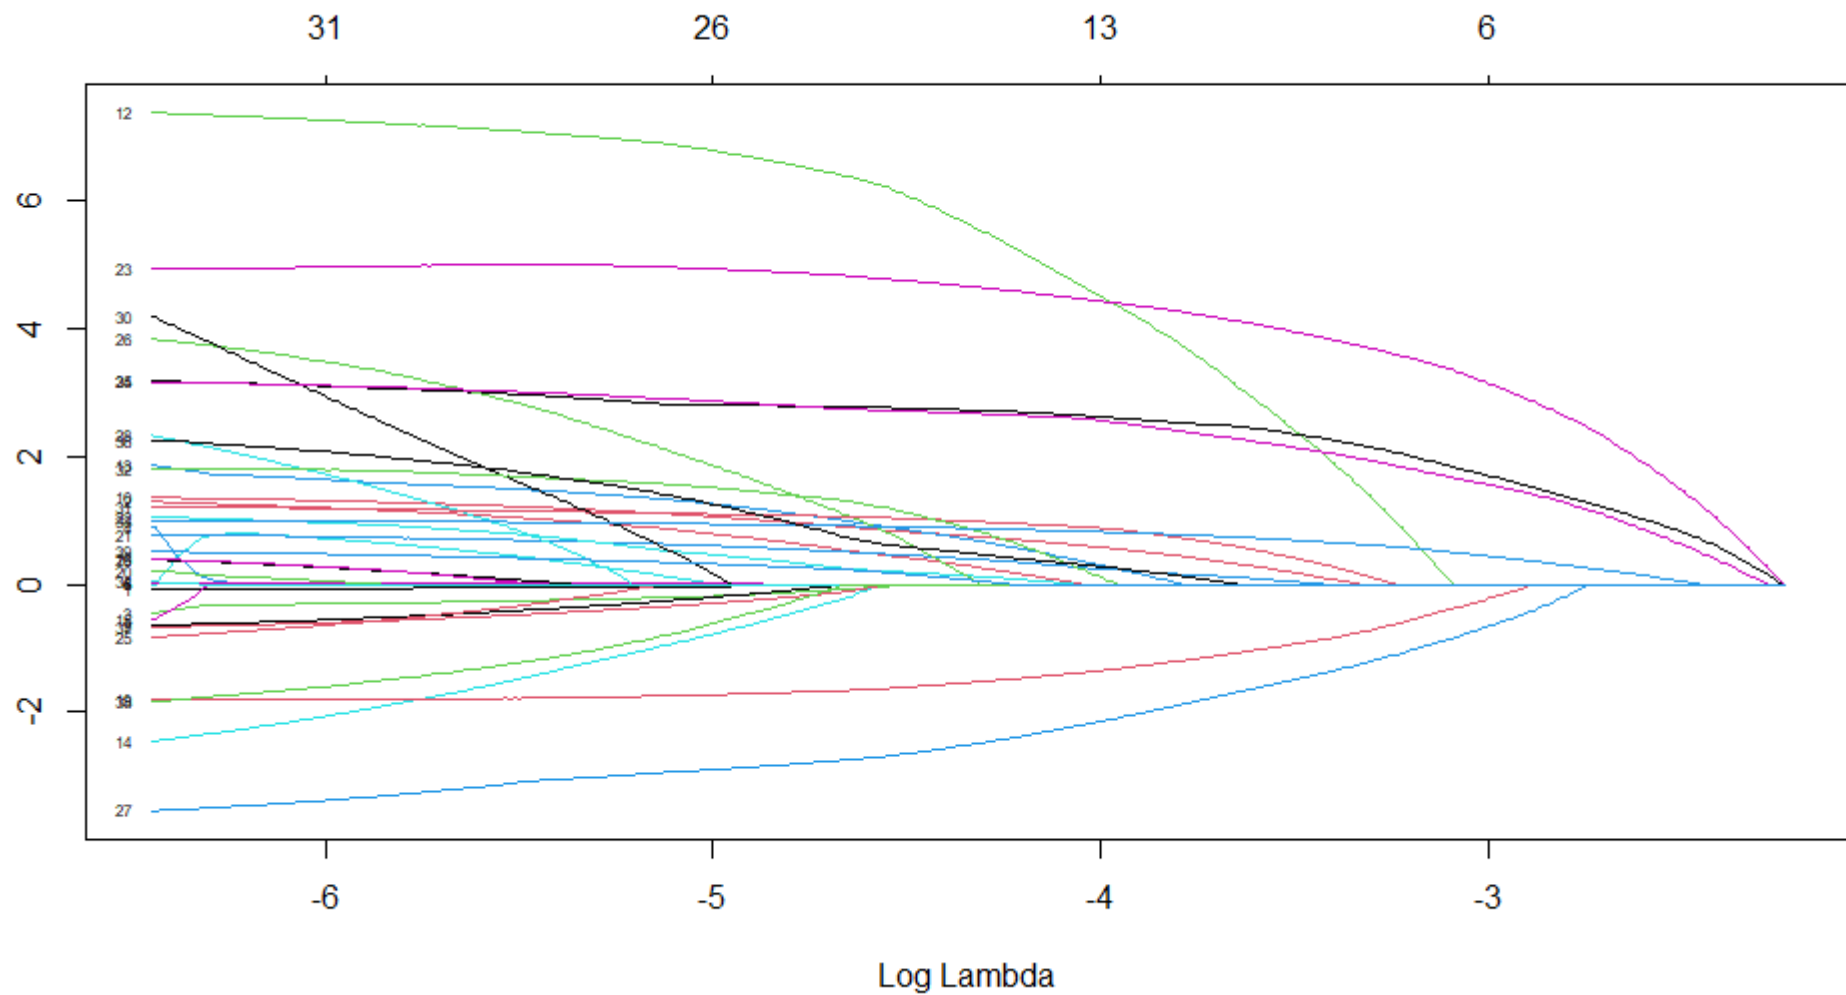

38 38 38 38 37 35 34 34 33 33 34 31 30 30 28 24 23 17 15 12 10 8 6 6 4 4 3

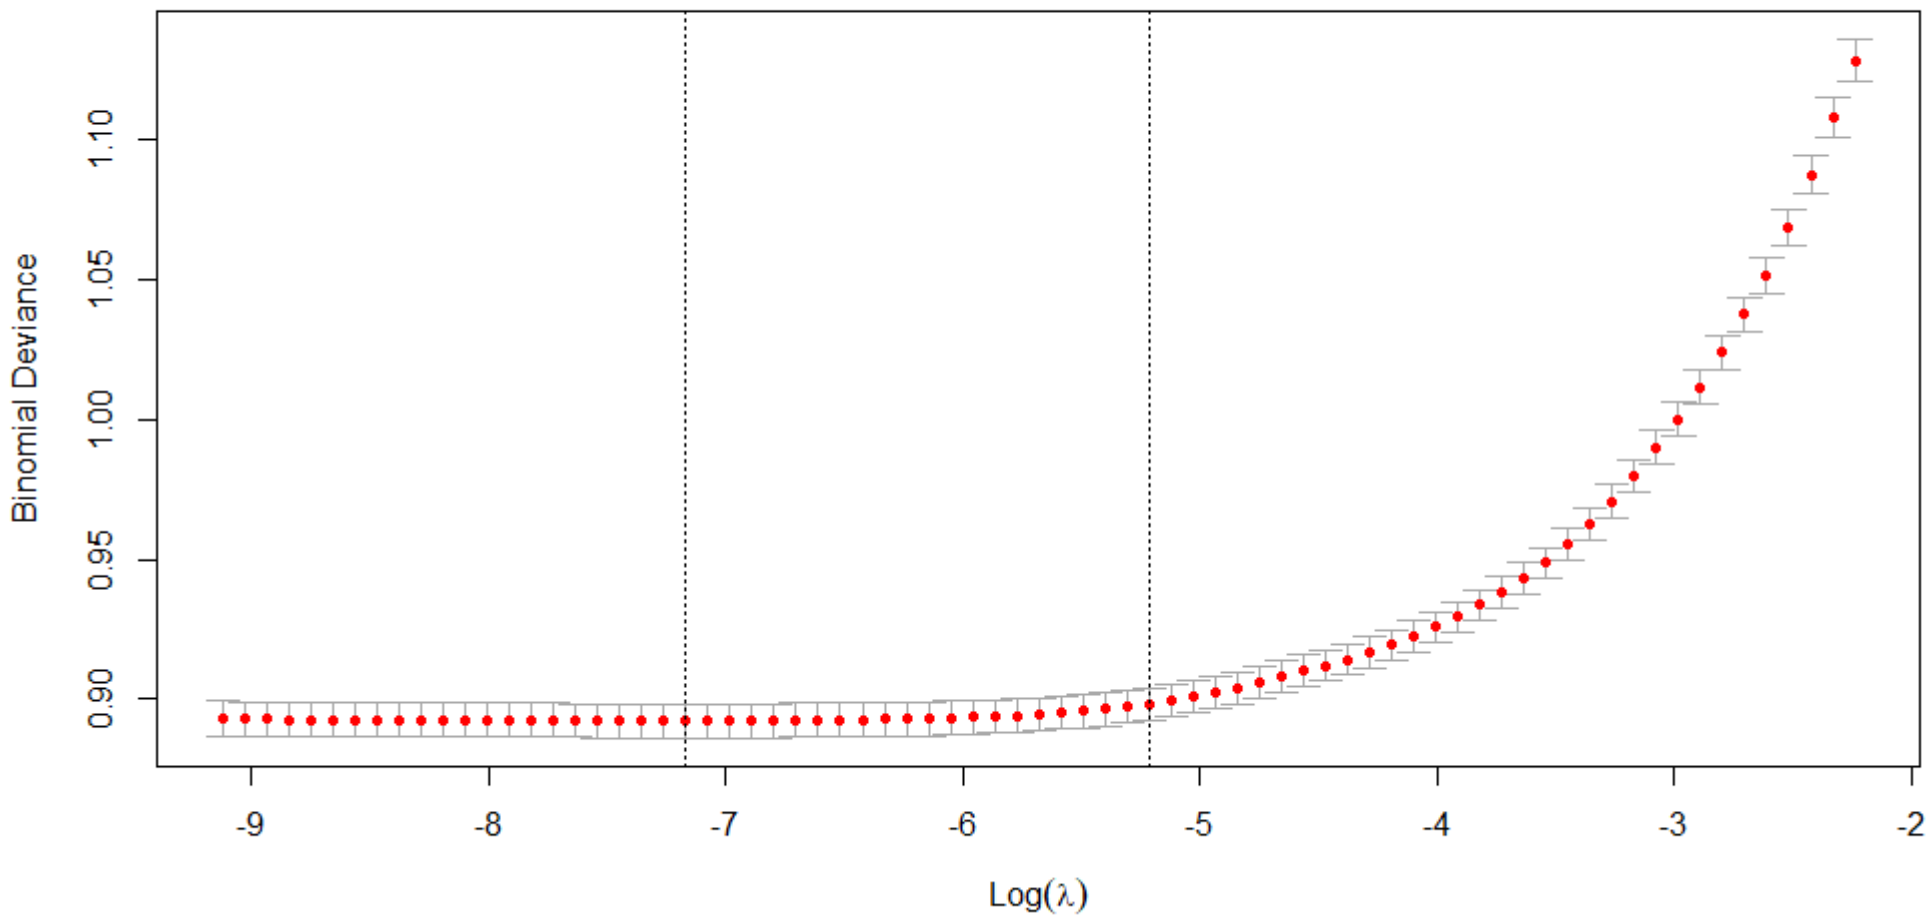

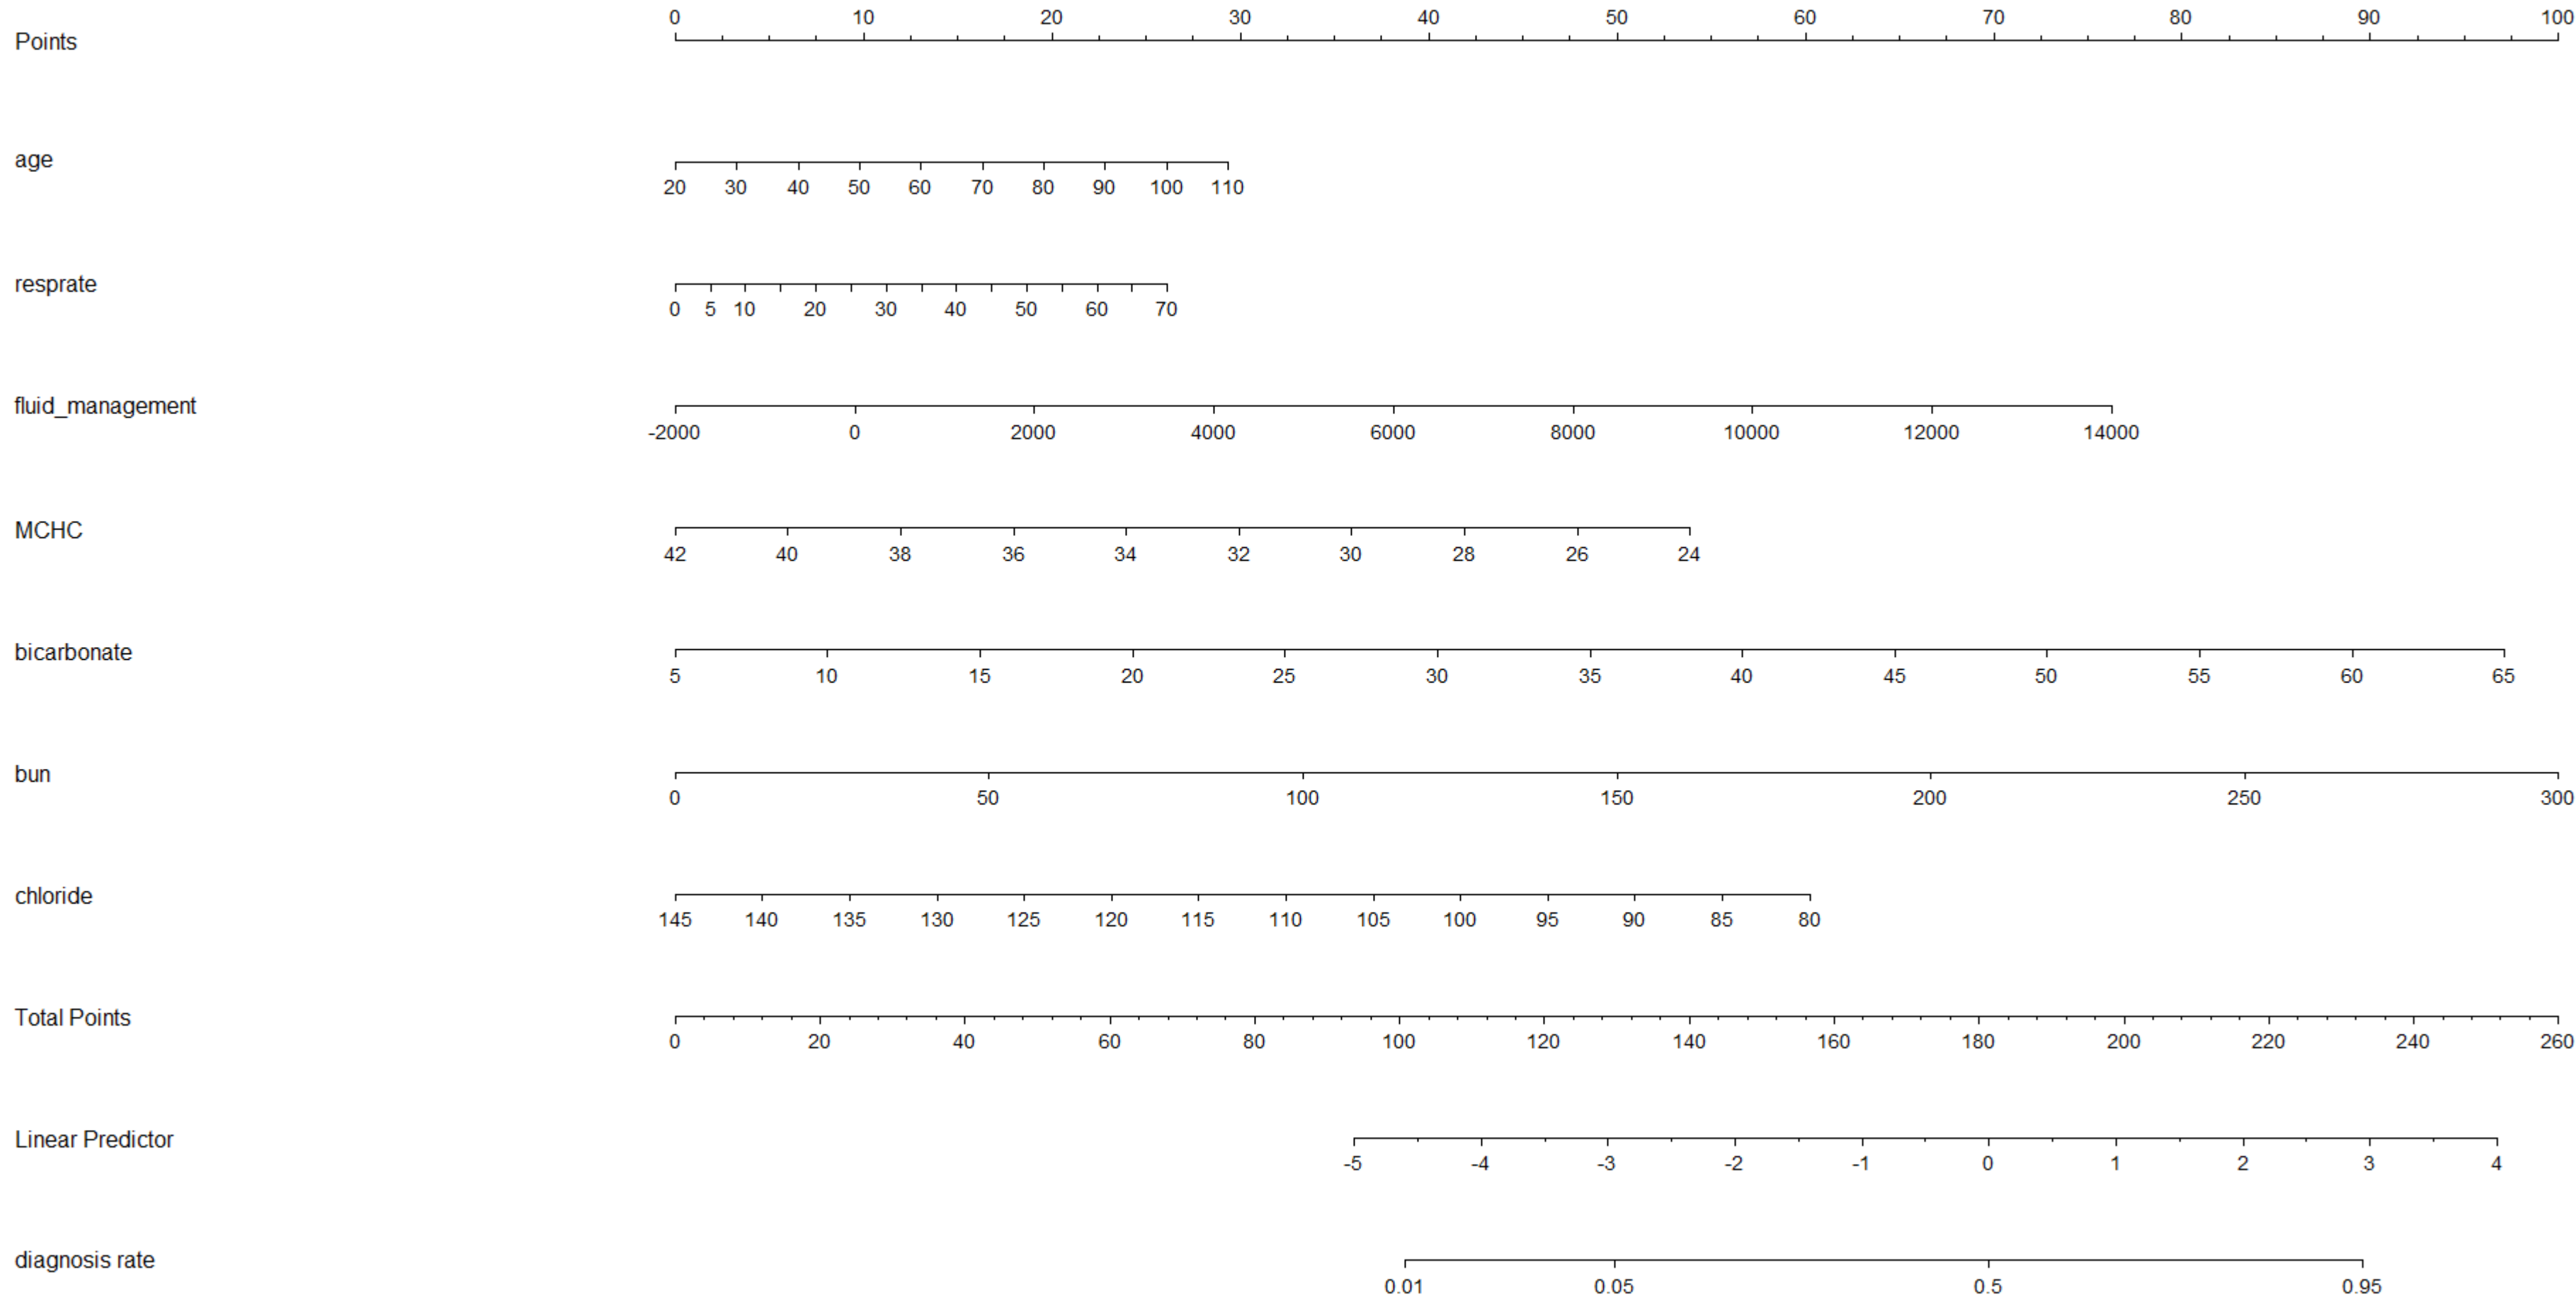

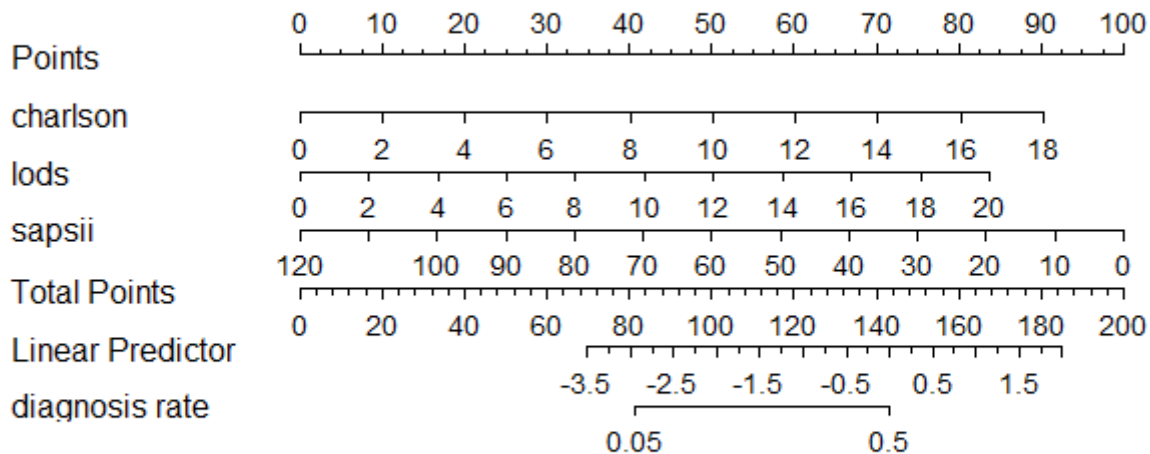



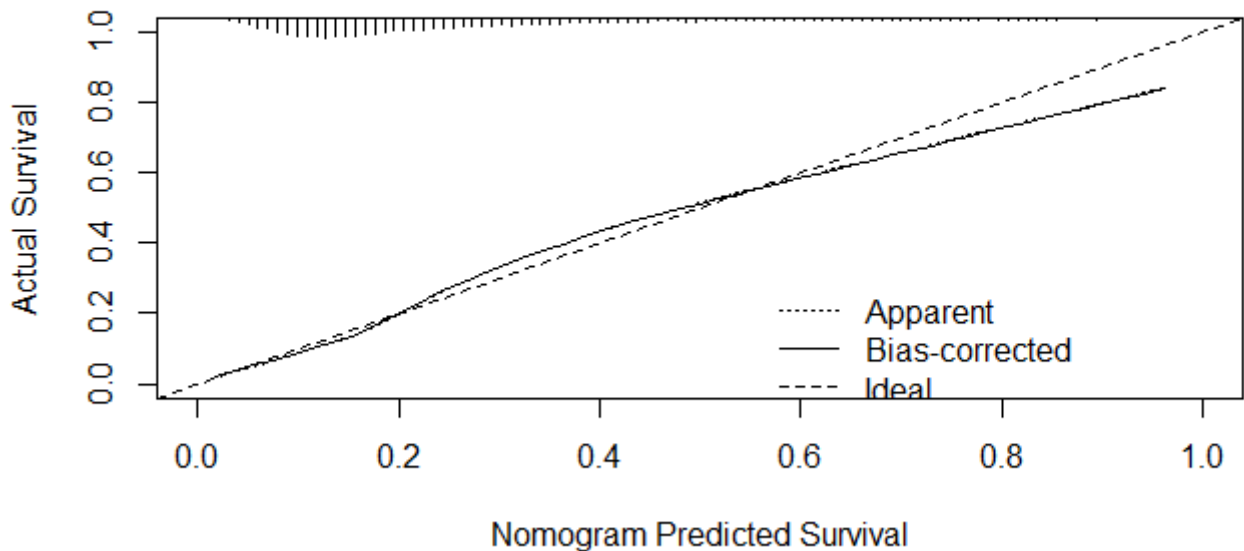

B= 1000 repetitions, boot

Mean absolute error=0.018 n=9089

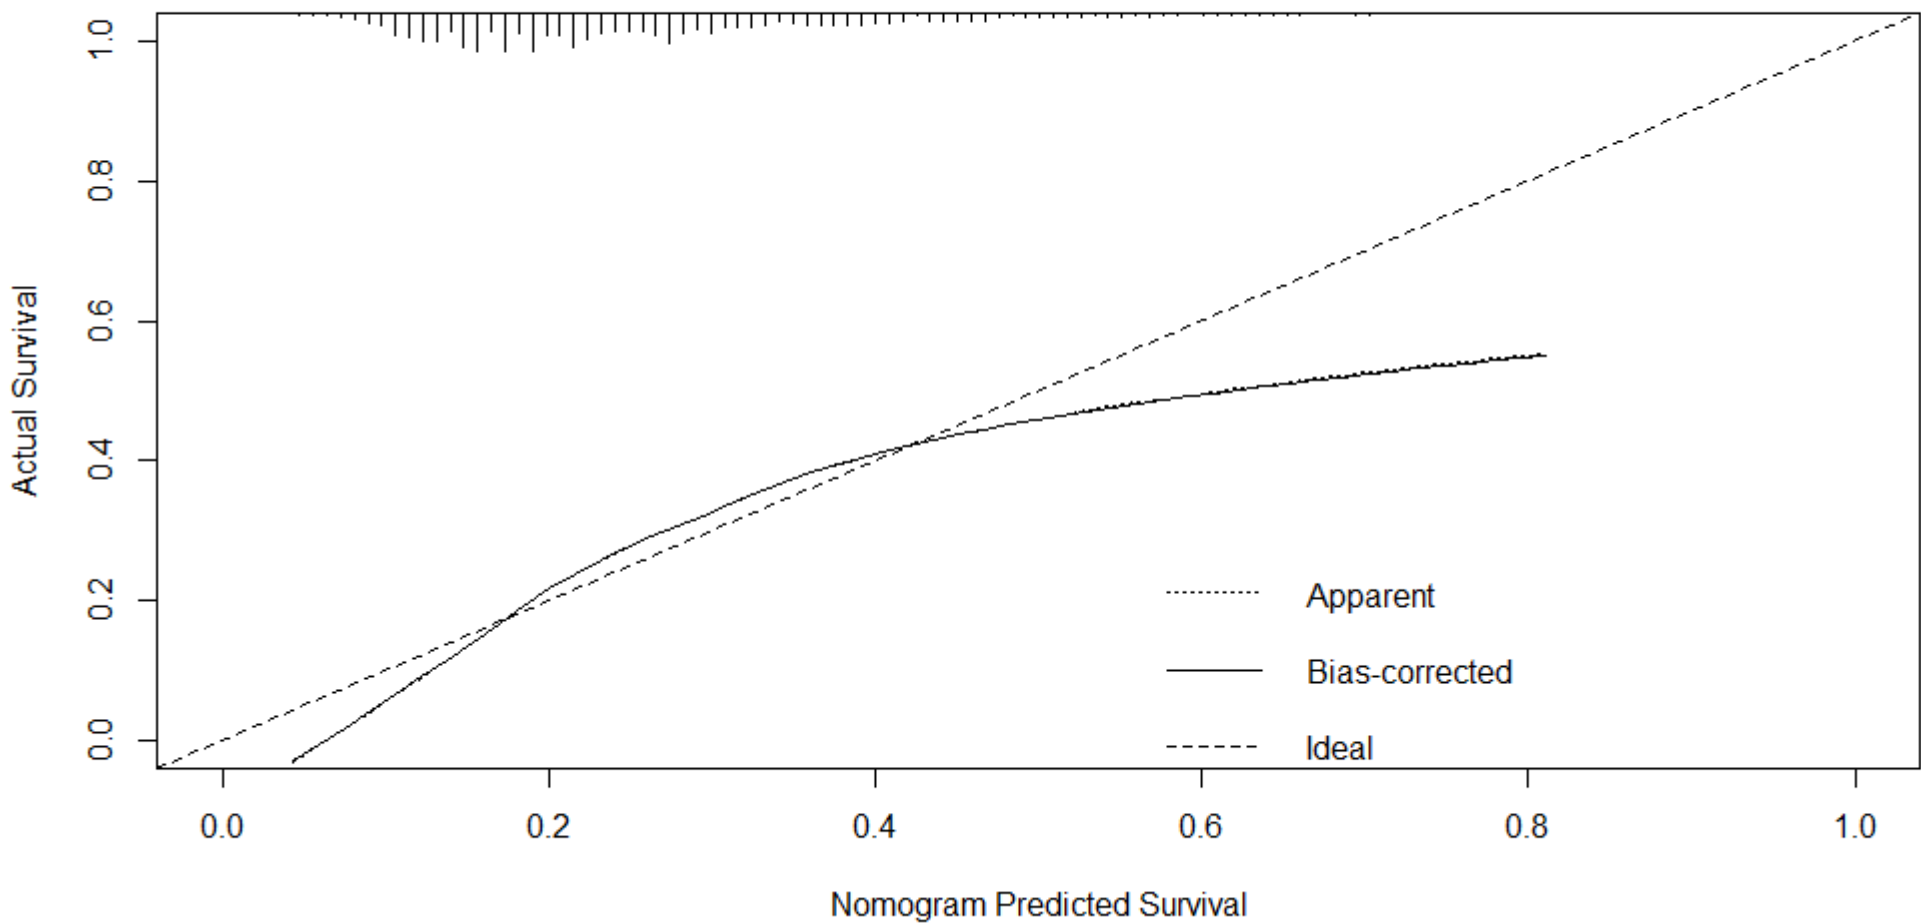

B= 1000 repetitions, boot

Mean absolute error=0.026 n=9089

train

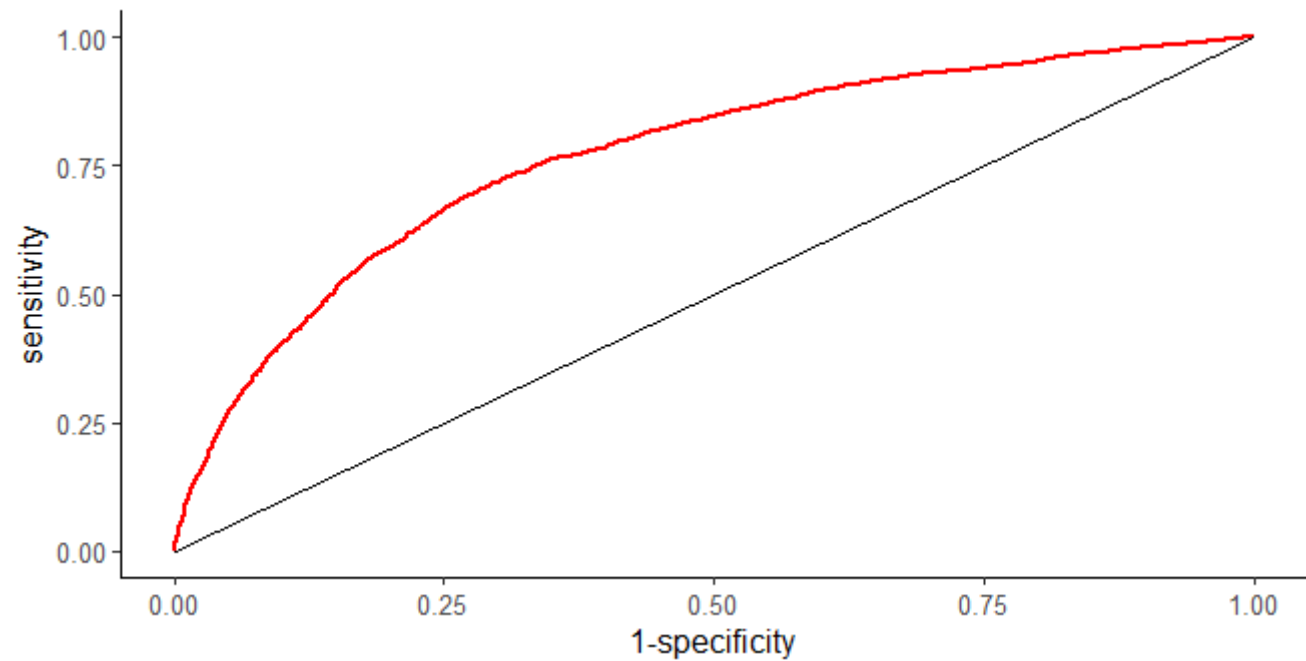

test

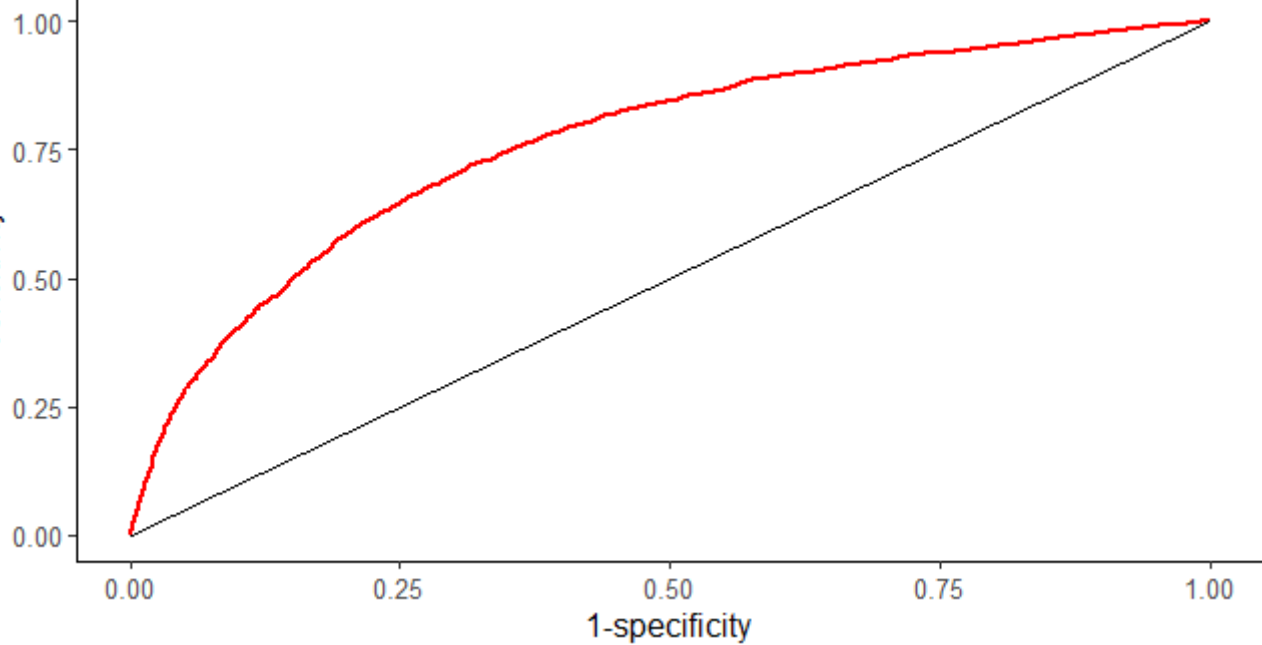

train

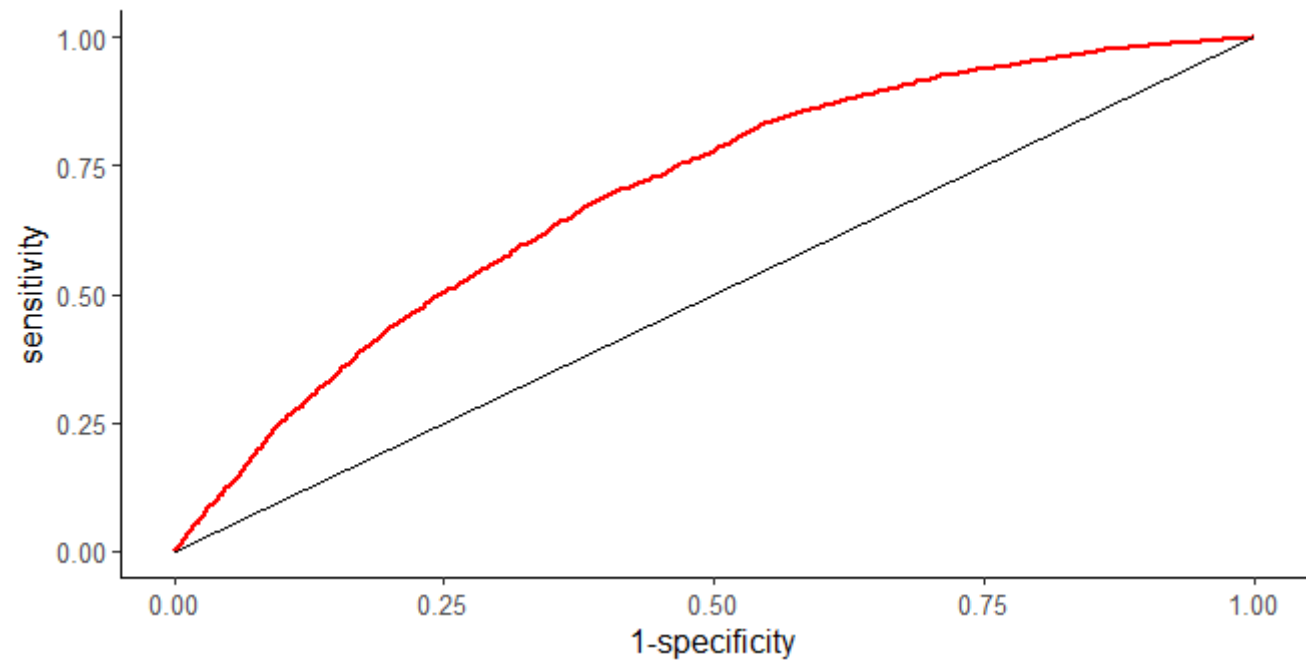

test

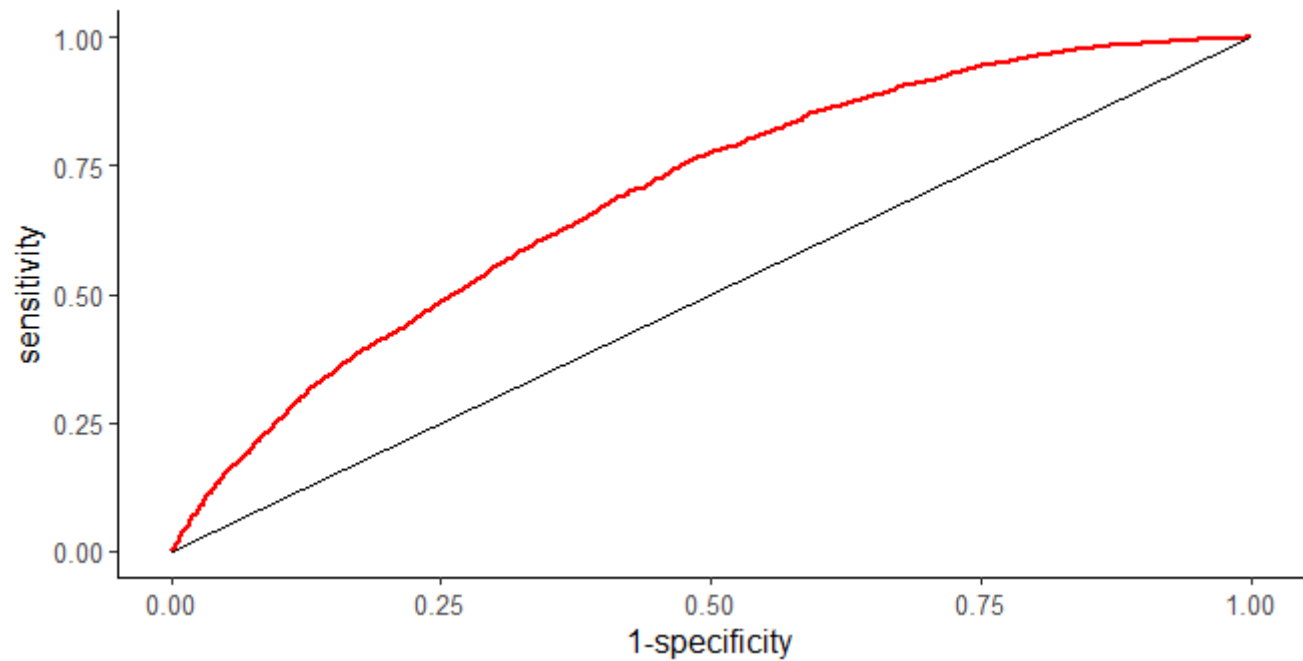

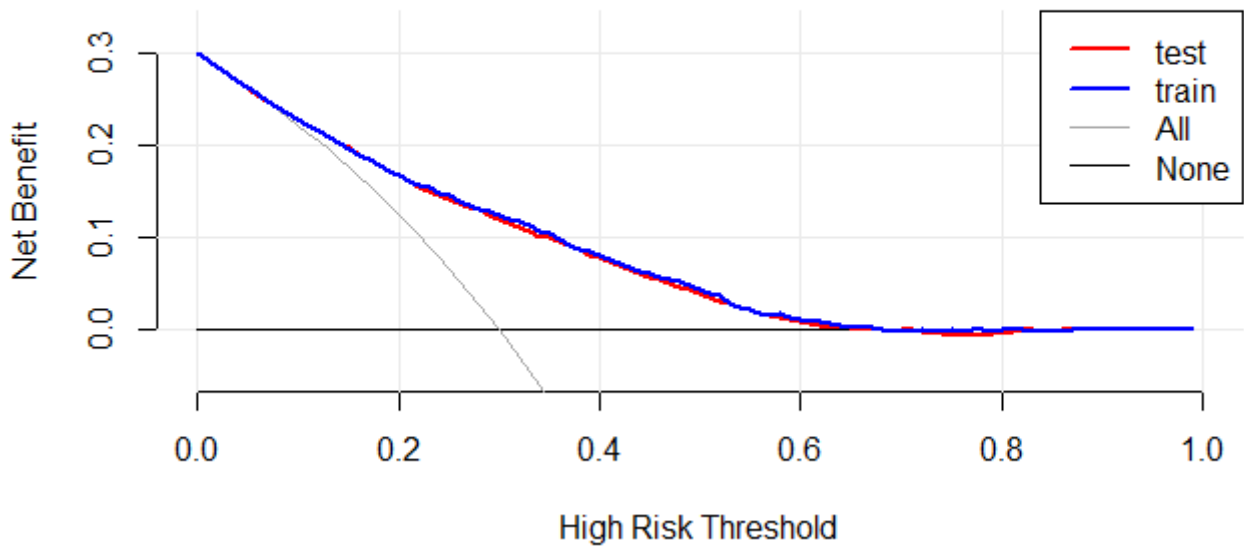

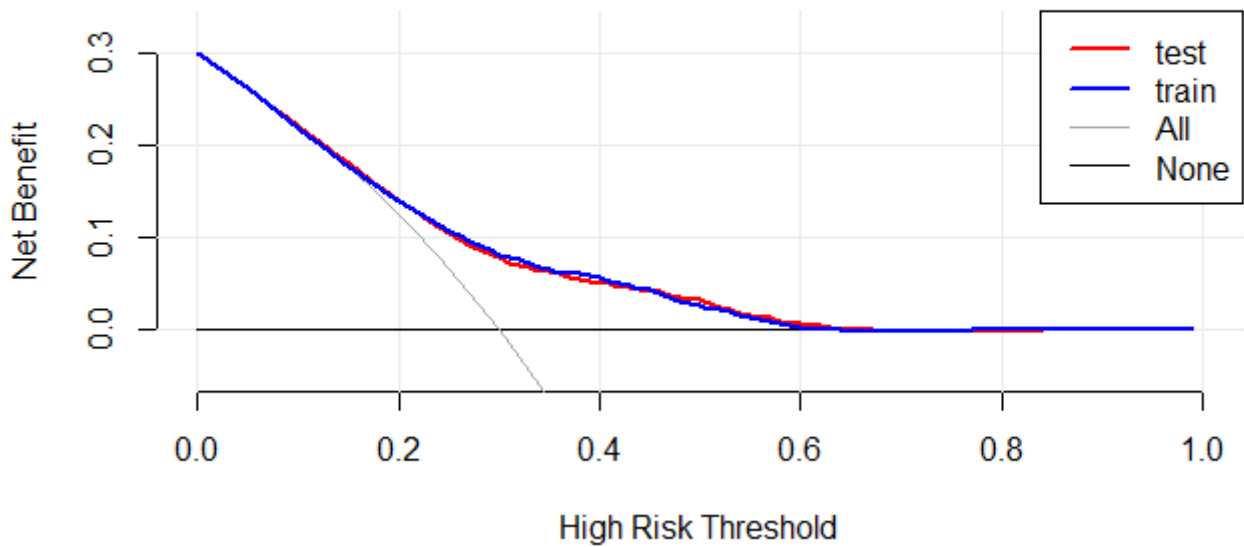



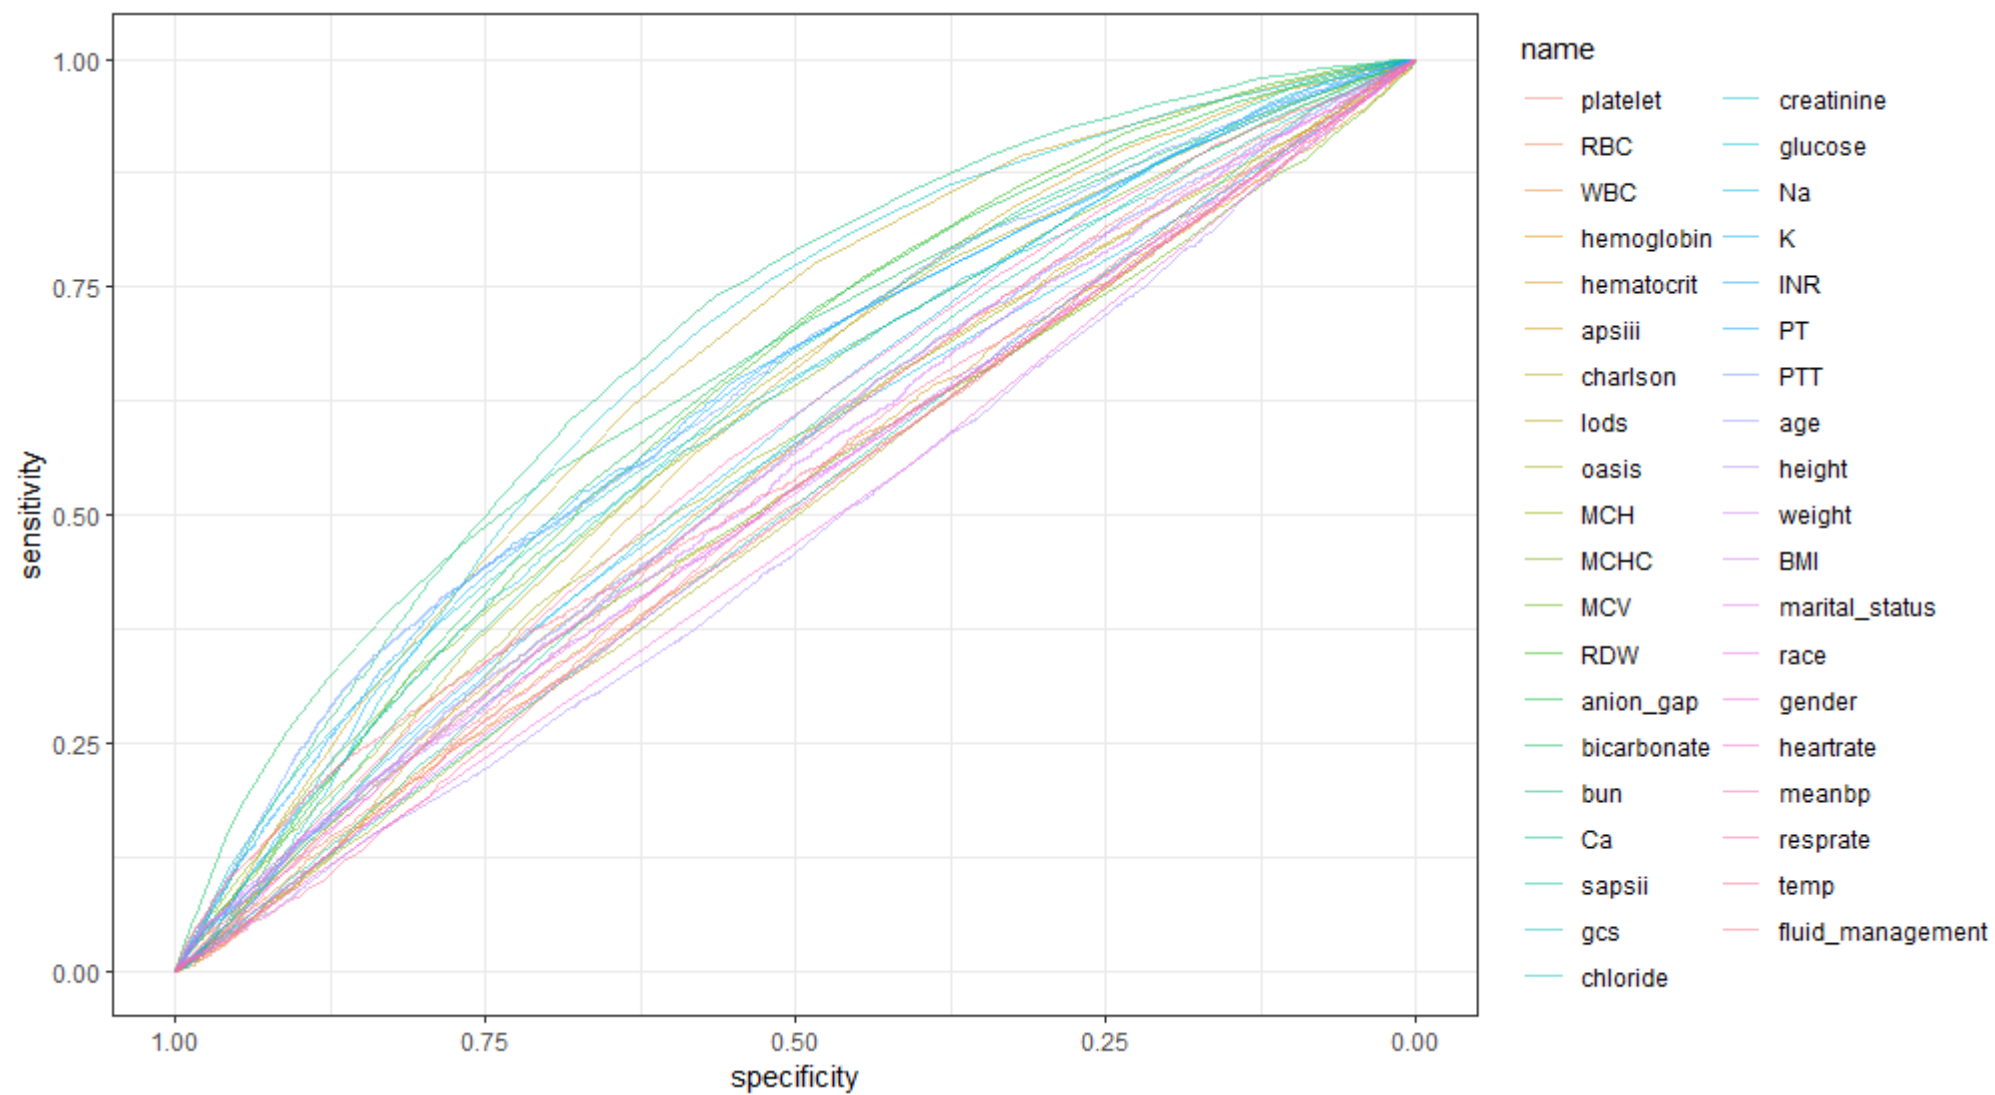

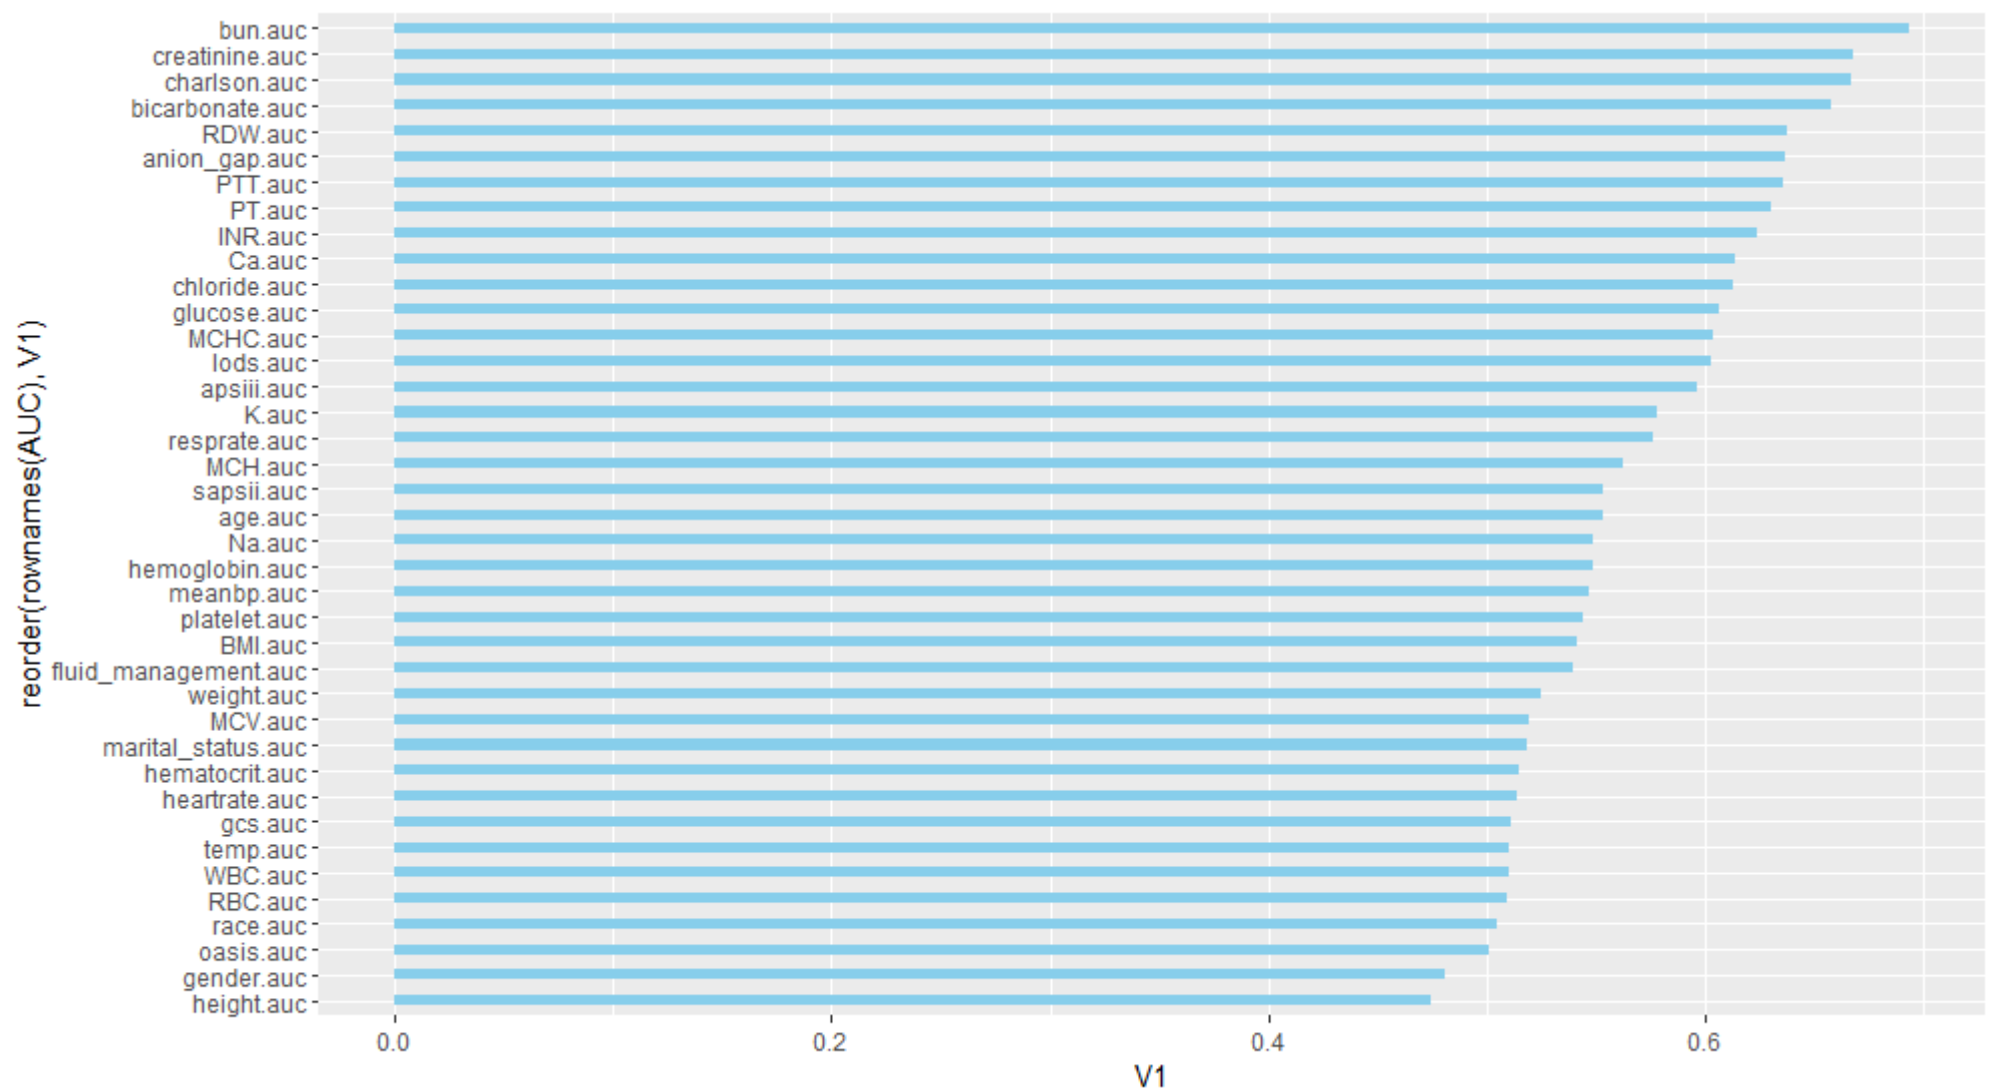

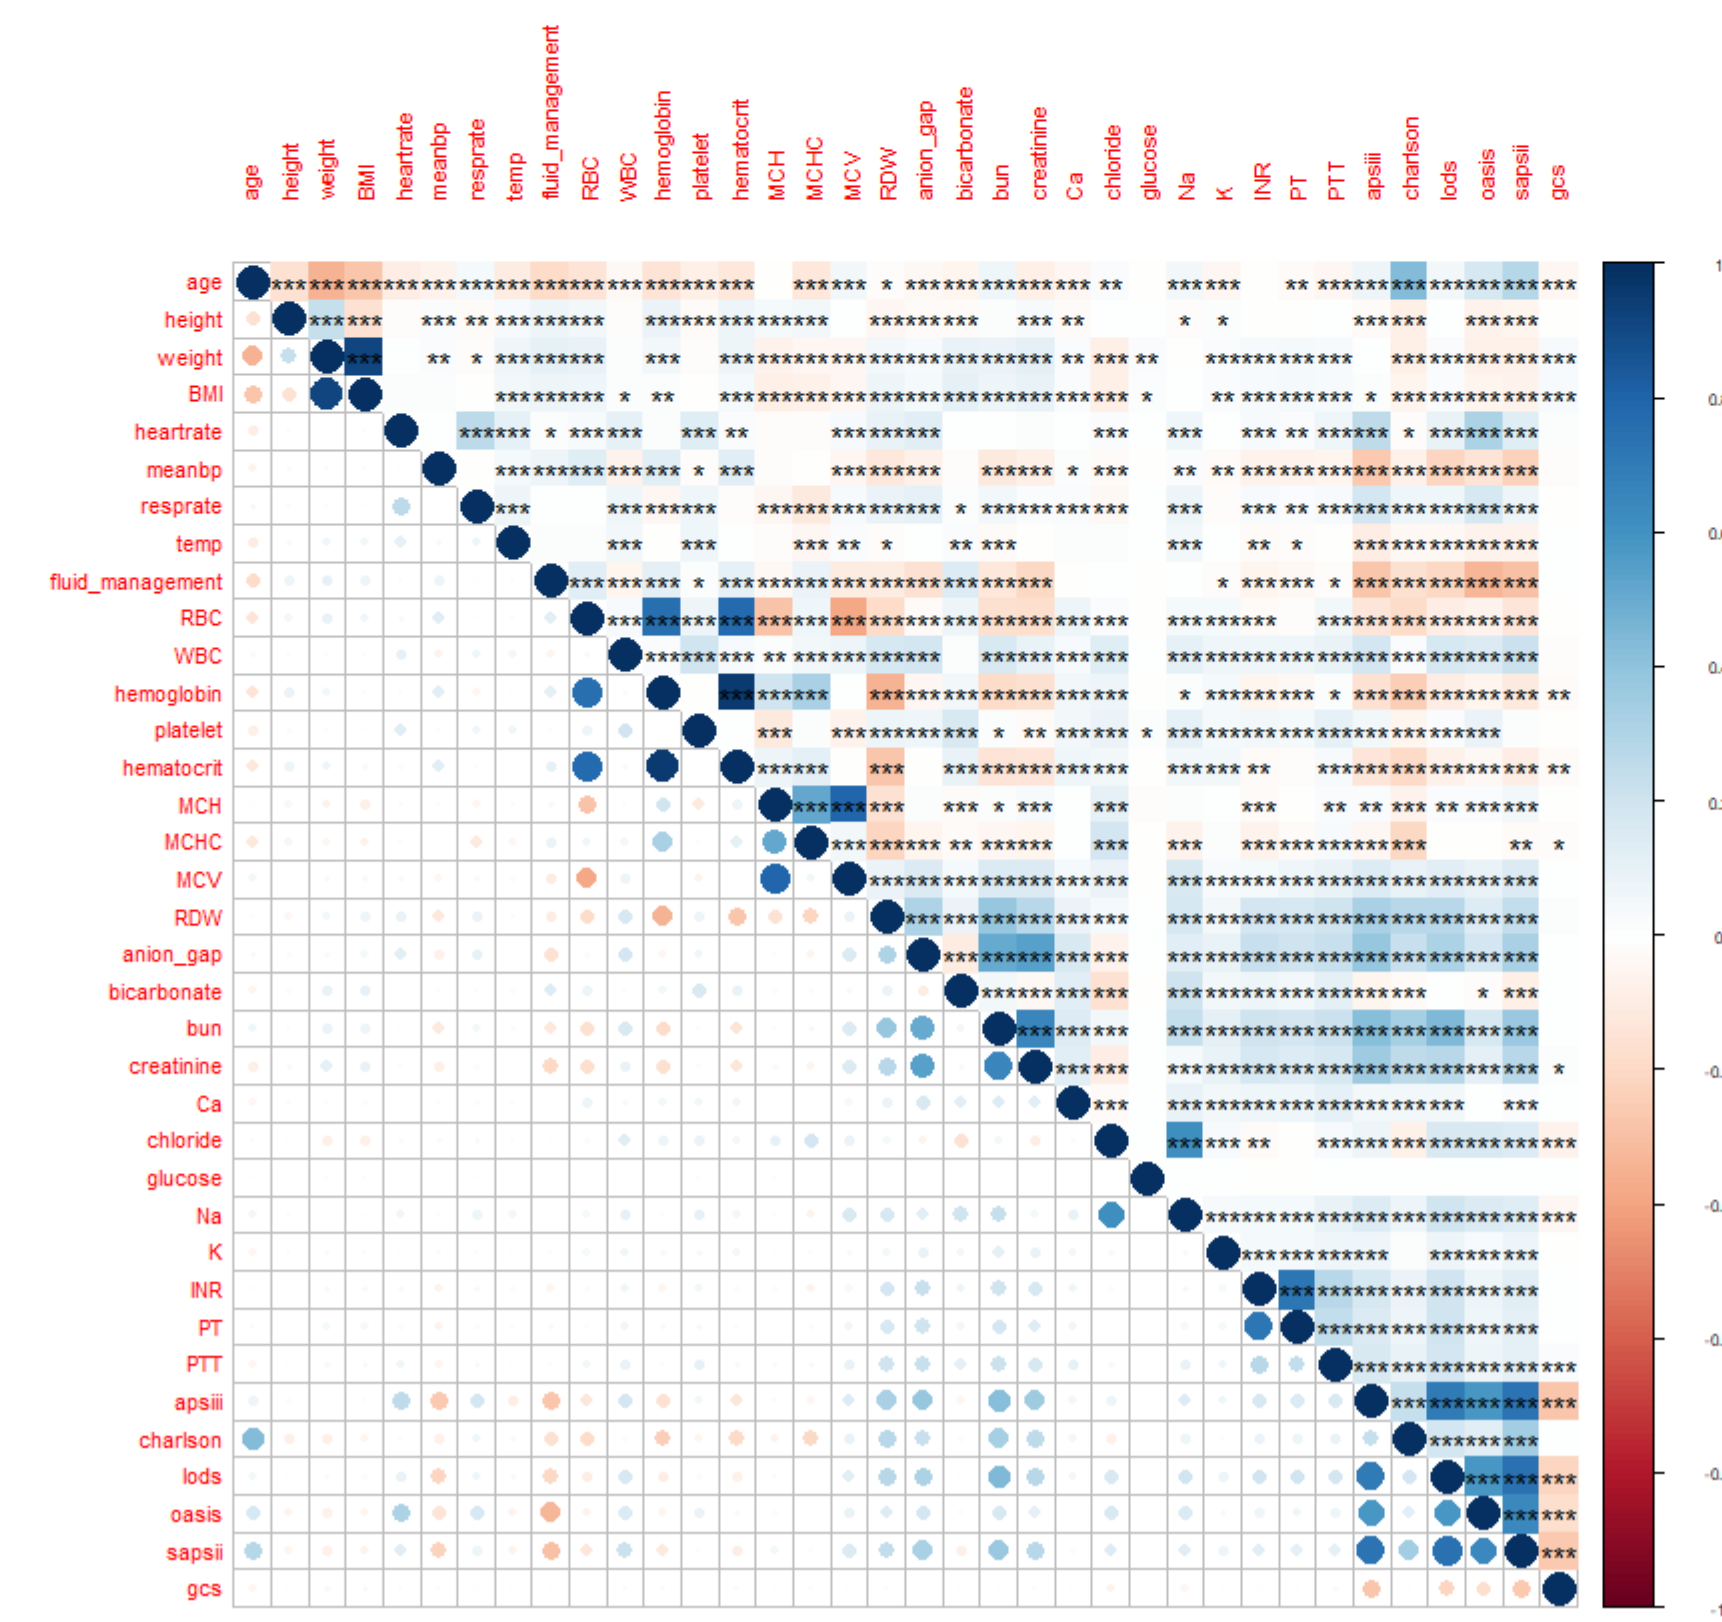

|    |                       |       |            |            |           |           |                     |       |         |              |       |
|----|-----------------------|-------|------------|------------|-----------|-----------|---------------------|-------|---------|--------------|-------|
| 1  | Variables             | Total | (n = 10    | (n = 1359  | 1         | (n = 4582 | p                   |       |         |              |       |
| 2  | gender, n (%)         |       |            |            |           |           | < 0.001             |       |         |              |       |
| 3  |                       | 0     | 7613 (42)  | 5564 (41)  | 2049 (45) |           |                     |       |         |              |       |
| 4  |                       | 1     | 10566 (58) | 8033 (59)  | 2533 (55) |           |                     |       |         |              |       |
| 5  | age, Media            | 76.16 | (67.4      | 75.57      | (66.8     | 77.84     | (69.2 < 0.001       |       |         |              |       |
| 6  | height, Me            | 170   | (162.6,    | 170        | (163,     | 1170      | (160, 1 < 0.001     |       |         |              |       |
| 7  | weight, Me            | 82.3  | (69,       | 91.82      | (69,      | 97.1      | 83.7 (69.85 < 0.001 |       |         |              |       |
| 8  | BMI, Medi             | 28.49 | (24.3      | 28.28      | (24.1     | 29.03     | (24.9 < 0.001       |       |         |              |       |
| 9  | marital_status, n (%) |       |            |            |           |           | < 0.001             |       |         |              |       |
| 10 |                       | 0     | 3684 (20)  | 2757 (20)  | 927 (20)  |           |                     |       |         |              |       |
| 11 |                       | 1     | 9167 (50)  | 6995 (51)  | 2172 (47) |           |                     |       |         |              |       |
| 12 |                       | 2     | 1565 (9)   | 1182 (9)   | 383 (8)   |           |                     |       |         |              |       |
| 13 |                       | 3     | 3763 (21)  | 2663 (20)  | 1100 (24) |           |                     |       |         |              |       |
| 14 | race, n (%)           |       |            |            |           |           | 0.21                |       |         |              |       |
| 15 |                       | 0     | 13543 (74) | 10162 (75) | 3381 (74) |           |                     |       |         |              |       |
| 16 |                       | 1     | 4636 (26)  | 3435 (25)  | 1201 (26) |           |                     |       |         |              |       |
| 17 | heartrate, M          | 101   | (78,       | 12100      | (77.5,    | 102       | (80,                | 12000 | 0.006   |              |       |
| 18 | meanbp, M             | 58    | (51,       | 82.1       | 58        | (51,      | 83.1                | 56    | (49,    | 78.1 < 0.001 |       |
| 19 | resprate, M           | 27    | (24,       | 31.1       | 27        | (23,      | 31)                 | 28    | (25,    | 33) < 0.001  |       |
| 20 | temp, Med             | 36.39 | (36.0      | 36.5       | (36.0     | 36.39     | (36.0               |       | 0.034   |              |       |
| 21 | fluid_man             | 1365  | (805,      | 1345       | (804,     | 1450      | (813,               |       | < 0.001 |              |       |
| 22 | RBC, Medi             | 3.86  | (3.43,     | 3.86       | (3.43,    | 3.88      | (3.43,              |       | 0.049   |              |       |
| 23 | WBC, Medi             | 13.9  | (10.1,     | 13.9       | (10.1,    | 14        | (10.3,              | 14    | 0.045   |              |       |
| 24 | hemoglobi             | 11.7  | (10.3,     | 11.8       | (10.4,    | 11.4      | (10.1,              |       | < 0.001 |              |       |
| 25 | platelet, M           | 254   | (190,      | 3249       | (185,     | 3269      | (203,               | 3     | < 0.001 |              |       |
| 26 | hematocrit            | 36    | (32.1,     | 41.36      | (32.3,    | 41.35.6   | (31.9,              |       | 0.003   |              |       |
| 27 | MCH, Med              | 30.8  | (29.2,     | 30.9       | (29.4,    | 30.4      | (28.6,              |       | < 0.001 |              |       |
| 28 | MCHC, Me              | 33.6  | (32.5,     | 33.8       | (32.7,    | 33.2      | (32,                | 3     | < 0.001 |              |       |
| 29 | MCV, Medi             | 94    | (90,       | 98)        | 94        | (90,      | 98)                 | 95    | (90,    | 99) < 0.001  |       |
| 30 | RDW, Med              | 15.8  | (14.4,     | 15.5       | (14.2,    | 16.7      | (15.2,              |       | < 0.001 |              |       |
| 31 | anion_gap,            | 17    | (15,       | 20)        | 17        | (15,      | 19)                 | 19    | (16,    | 22) < 0.001  |       |
| 32 | bicarbonat            | 29    | (26,       | 32)        | 29        | (26,      | 31)                 | 31    | (28,    | 35) < 0.001  |       |
| 33 | bun, Medi             | 33    | (22,       | 55)        | 29        | (21,      | 48)                 | 47    | (32,    | 73) < 0.001  |       |
| 34 | creatinine,           | 1.3   | (1,        | 2.2)       | 1.2       | (0.9,     | 1.1)                | 1.8   | (1.3,   | 2.1) < 0.001 |       |
| 35 | Ca, Median            | 9     | (8.6,      | 9.5)       | 8.9       | (8.5,     | 9.1)                | 9.2   | (8.8,   | 9.1) < 0.001 |       |
| 36 | chloride, M           | 108   | (104,      | 1108       | (105,     | 1106      | (102,               | 1     | < 0.001 |              |       |
| 37 | glucose, M            | 177   | (143,      | 2171       | (140,     | 2197      | (156,               | 2     | < 0.001 |              |       |
| 38 | Na, Median            | 142   | (140,      | 1142       | (140,     | 1143      | (140,               | 1     | < 0.001 |              |       |
| 39 | K, Median             | 4.9   | (4.5,      | 5.1)       | 4.9       | (4.4,     | 5.1)                | 5     | (4.6,   | 5.7) < 0.001 |       |
| 40 | INR, Media            | 1.7   | (1.3,      | 2.1)       | 1.6       | (1.3,     | 2.1)                | 2.2   | (1.5,   | 3.1) < 0.001 |       |
| 41 | PT, Median            | 18.5  | (14.6,     | 17.4       | (14.3,    | 23.9      | (16.1,              |       | < 0.001 |              |       |
| 42 | PTT, Media            | 41.8  | (32.1,     | 39.2       | (31.4,    | 58.35     | (35.9               |       | < 0.001 |              |       |
| 43 | apsiii, Med           | 44    | (33,       | 57)        | 42        | (31,      | 56)                 | 48    | (38,    | 60) < 0.001  |       |
| 44 | charlson, M           | 6     | (4,        | 8)         | 6         | (4,       | 7)                  | 7     | (6,     | 9) < 0.001   |       |
| 45 | iods, Medi            | 5     | (3,        | 7)         | 4         | (3,       | 6)                  | 5     | (4,     | 7) < 0.001   |       |
| 46 | oasis, Med            | 32    | (27,       | 38)        | 32        | (27,      | 38)                 | 32    | (27,    | 38)          | 0.809 |

47 sapsii, Med 38 (31, 47) 38 (31, 47) 40 (33, 48) < 0.001  
48 gcs, Media 15 (15, 15) 15 (15, 15) 15 (15, 15) 0.001

## V1

|              |          |
|--------------|----------|
| bun.auc      | 0.693723 |
| creatinine.: | 0.667555 |
| charlson.au  | 0.666832 |
| bicarbonat   | 0.6574   |
| RDW.auc      | 0.637169 |
| anion_gap.   | 0.636693 |
| PTT.auc      | 0.635668 |
| PT.auc       | 0.630236 |
| INR.auc      | 0.623605 |
| Ca.auc       | 0.613499 |
| chloride.au  | 0.612968 |
| glucose.auc  | 0.606104 |
| MCHC.auc     | 0.60373  |
| lods.auc     | 0.602316 |
| apsiii.auc   | 0.596075 |
| K.auc        | 0.577893 |
| resprate.au  | 0.575868 |
| MCH.auc      | 0.56197  |
| sapsii.auc   | 0.55361  |
| age.auc      | 0.553435 |
| Na.auc       | 0.548635 |
| hemoglobii   | 0.548481 |
| meanbp.au    | 0.547079 |
| platelet.au  | 0.544108 |
| BMI.auc      | 0.541347 |
| fluid_man    | 0.539073 |
| weight.auc   | 0.524615 |
| MCV.auc      | 0.519201 |
| marital_sta  | 0.518705 |
| hematocrit   | 0.514507 |
| heartrate.a  | 0.513549 |
| gcs.auc      | 0.510718 |
| temp.auc     | 0.510425 |
| WBC.auc      | 0.509865 |
| RBC.auc      | 0.509729 |
| race.auc     | 0.504742 |
| oasis.auc    | 0.501189 |
| gender.auc   | 0.481012 |
| height.auc   | 0.474853 |
